# Supplementary material for: Effectiveness and safety of metformin in 51 675 patients with type 2 diabetes and different levels of renal function: a cohort study from the Swedish National Diabetes Register
Source: PubMed Central journal article supplement — BMJ Open. 2012 Jul 13;2(4):e001076. doi: 10.1136/bmjopen-2012-001076 (PMC3400073; doi:10.1136/bmjopen-2012-001076), 2012-07-13
Supplement: bmjopen-2012-001076-s2.pdf [file bmjopen-2012-001076-s2.pdf]

## **Definitions of the endpoints (Appendix Text)**

### **Cardiovascular disease (CVD)**

CVD was defined as diagnosis of myocardial infarction (ICD-10 code I21), angina pectoris (ICD-10 code I20.0), intracerebral haemorrhage, cerebral infarction, unspecified stroke (ICD-10 codes I61, I63, I64 and I679), peripheral vascular disease (PVD, ICD-10 codes E105, E115, E145, I702, I731, I739 and I792), or intervention with percutaneous coronary intervention (PCI) or coronary artery bypass grafting (CABG), whichever occurred first.

### **Acidosis/serious infection**

Acidosis/infection was defined as diagnosis of acidosis or chock (ICD-10 codes E10.1, E10.1A, E10.1D, E10.1X, E11.1, E11.1A, E11.1D, E11.1X, E13.1, E14.1, E87.2, R57.1, R57.2, R57.8 or R57.9), or diagnosis of serious infection (ICD-10 codes A00-A09, A15-A19, A32.7, A39-A41, A42.7, A48, B37.7, I00-I02, I33, I38, I39, J13-J18, J85, J86, K25, K61, K80.0, K80.3, K80.4, K81, K83.0, K85, K86, M00, M46.2, M72.6, M86.0, M86.1, M86.8 or M86.9) or acute renal failure (ICD-10 codes N10.9 or N17).
