# Supplementary material for: Effectiveness and safety of metformin in 51 675 patients with type 2 diabetes and different levels of renal function: a cohort study from the Swedish National Diabetes Register
Source: PubMed Central journal article supplement — BMJ Open. 2012 Jul 13;2(4):e001076. doi: 10.1136/bmjopen-2012-001076 (PMC3400073; doi:10.1136/bmjopen-2012-001076), 2012-07-13
Supplement: bmjopen-2012-001076-s3.pdf [file bmjopen-2012-001076-s3.pdf]

Appendix Table 1. Baseline characteristics in groups of patients treated with metformin only, insulin only, or other OHA only, applied in Cox regression analyses presented in Table 3.

|                                    | Metformin Only | Insulin only | Other OHA only | P metformin only/<br>insulin only<br>Unadjusted | P metformin only/<br>insulin only<br>Adjusted for PS | P metformin only/<br>other OHA only<br>Unadjusted | P metformin only/<br>other OHA only<br>Adjusted for PS |
|------------------------------------|----------------|--------------|----------------|-------------------------------------------------|------------------------------------------------------|---------------------------------------------------|--------------------------------------------------------|
| N                                  | 14697          | 12291        | 5171           |                                                 |                                                      |                                                   |                                                        |
| Age (Years)                        | 63.8 (9.7)     | 65.2 (10.5)  | 69.7 (9.5)     | <0.001                                          | 0.49                                                 | <0.001                                            | 0.126                                                  |
| HbA1c (%)                          | 6.9 (3.1)      | 7.6 (3.4)    | 6.9 (3.0)      | <0.001                                          | 0.46                                                 | 0.002                                             | 0.24                                                   |
| Systolic blood pressure (mmHg)     | 139.4 (16.6)   | 138.9 (18.0) | 141.4 (17.5)   | 0.018                                           | 0.96                                                 | <0.001                                            | 0.164                                                  |
| Diabetes duration (Years)          | 4.6 (4.3)      | 14.3 (10.4)  | 7.5 (6.2)      | <0.001                                          | 0.78                                                 | <0.001                                            | 0.37                                                   |
| eGFR (mL/min/1.73 m <sup>2</sup> ) | 82.0 (20.2)    | 73.6 (23.8)  | 73.8 (21.1)    | <0.001                                          | 0.94                                                 | <0.001                                            | 0.177                                                  |
| BMI (Kg/m <sup>2</sup> )           | 30.7 (4.9)     | 27.4 (4.8)   | 27.2 (4.5)     | <0.001                                          | 0.53                                                 | <0.001                                            | 0.008                                                  |
| Non-HDL-C (mmol/L)                 | 3.64 (1.00)    | 3.35 (0.98)  | 3.60 (0.99)    | <0.001                                          | 0.78                                                 | 0.008                                             | 0.62                                                   |
| Microalbuminuria                   | 21.0%          | 30.8%        | 24.2%          | <0.001                                          | 0.46                                                 | <0.001                                            | 0.50                                                   |
| Previous hospitalisation           | 11.5%          | 23.1%        | 15.5%          | <0.001                                          | 0.57                                                 | <0.001                                            | 0.73                                                   |
| Female sex                         | 44.7%          | 40.2%        | 39.2%          | <0.001                                          | 0.73                                                 | <0.001                                            | 0.59                                                   |
| History of CVD                     | 15.9%          | 26.4%        | 21.4%          | <0.001                                          | 0.97                                                 | <0.001                                            | 0.111                                                  |
| History of CHF                     | 3.5%           | 8.9%         | 6.4%           | <0.001                                          | 0.022                                                | <0.001                                            | 0.74                                                   |
| History of serious infections      | 1.8%           | 4.9%         | 2.8%           | <0.001                                          | 0.96                                                 | <0.001                                            | 0.72                                                   |
| Cardiac glycosides                 | 2.6%           | 3.0%         | 4.3%           | 0.064                                           | 0.96                                                 | <0.001                                            | 0.196                                                  |
| Organic nitrates                   | 6.3%           | 8.5%         | 8.8%           | <0.001                                          | 0.61                                                 | <0.001                                            | 0.45                                                   |
| Acetylsalicylic Acid               | 45.4%          | 45.7%        | 45.9%          | 0.56                                            | 0.58                                                 | 0.52                                              | 0.65                                                   |
| Lipid modifying agents             | 49.9%          | 44.8%        | 44.1%          | <0.001                                          | 0.88                                                 | <0.001                                            | 0.94                                                   |
| Antihypertensive agents            | 71.8%          | 66.2%        | 71.3%          | <0.001                                          | 0.38                                                 | 0.58                                              | 0.81                                                   |
| Multi-dose dispensation            | 1.4%           | 3.0%         | 1.5%           | <0.001                                          | 0.97                                                 | 0.54                                              | 0.97                                                   |
| Smoker                             | 14.8%          | 14.9%        | 12.3%          | 0.77                                            | 0.104                                                | <0.001                                            | 0.28                                                   |

Means ± standard deviation (SD) and proportions (%) of clinical variables at baseline. P values are given for comparison between metformin only and insulin only, and between metformin only and other OHA only, unadjusted and after adjustment by stratification for octiles of propensity scores applied for each comparison.

Appendix Table 2: Time of exposure (months) to specific glucose-lowering agents, and proportions changing treatment (%) in each group.

|                                  | Metformin Only | Metformin + other OHA | Metformin + insulin | Insulin only | Other OHA only | Insulin + other OHA | Metformin + insulin + other OHA |
|----------------------------------|----------------|-----------------------|---------------------|--------------|----------------|---------------------|---------------------------------|
| Mean Exposure time to metformin  | 49,4           | 51,0                  | 46,3                |              |                |                     | 48,9                            |
| Mean Exposure time to insulin    |                |                       | 51,8                | 55,3         |                | 54,1                | 53,4                            |
| Mean Exposure time to Other Oral |                | 49,1                  |                     |              | 45,3           | 39,5                | 48,3                            |
| Change treatment (%)             | 80.8 %         | 80.5 %                | 81.8 %              | 91.3 %       | 88.4 %         | 56.5 %              | 93.9 %                          |

Appendix Table 3: Numbers and frequencies (%) of endpoint events in each treatment group.

|                                  | Metformin Only | Metformin + other OHA | Metformin + insulin | Insulin only | Other OHA only | Insulin + other OHA | Metformin+ insulin + other OHA |
|----------------------------------|----------------|-----------------------|---------------------|--------------|----------------|---------------------|--------------------------------|
| Any CVD                          | 1734 (3.3%)    | 1287 (4%)             | 1338 (5.4%)         | 2389 (5.9%)  | 929 (5.2%)     | 334 (7.8%)          | 415 (5.4%)                     |
| Fatal CVD                        | 264 (0.5%)     | 230 (0.6%)            | 276 (1%)            | 681 (1.4%)   | 237 (1.2%)     | 94 (1.8%)           | 74 (0.8%)                      |
| Acidosis/serious infection       | 1154 (2.1%)    | 843 (2.5%)            | 899 (3.4%)          | 1867 (4.3%)  | 623 (3.3%)     | 235 (5%)            | 259 (3.1%)                     |
| Fatal acidosis/serious infection | 127 (0.2%)     | 95 (0.3%)             | 124 (0.4%)          | 325 (0.7%)   | 109 (0.5%)     | 41 (0.8%)           | 29 (0.3%)                      |
| All-cause mortality              | 971 (1.7%)     | 834 (2.4%)            | 818 (2.9%)          | 2002 (4.2%)  | 745 (3.7%)     | 258 (4.9%)          | 250 (2.8%)                     |

Appendix Table 4. Adjusted hazard ratios (HR) with 95% confidence intervals (CI) for any CVD, fatal CVD, any acidosis/serious infection, fatal acidosis/serious infection, and all-cause mortality in all patients, in each treatment group, and with other OHA only as reference

|                                  | Other OHA only | Insulin Only     | Metformin only   | Insulin + other OHA | Metformin + other OHA | Metformin + insulin | Metformin + insulin + other OHA |
|----------------------------------|----------------|------------------|------------------|---------------------|-----------------------|---------------------|---------------------------------|
| Any CVD                          | Reference      | 1.13 (1.04-1.22) | 0.88 (0.81-0.96) | 1.24 (1.09-1.41)    | 0.98 (0.9-1.07)       | 1.12 (1.03-1.23)    | 1.17 (1.04-1.32)                |
| Fatal CVD                        | Reference      | 1.09 (0.92-1.28) | 0.77 (0.64-0.93) | 0.91 (0.7-1.16)     | *                     | *                   | 0.93 (0.71-1.22)                |
| Any acidosis/serious infection   | Reference      | 1.19 (1.08-1.31) | 0.87 (0.78-0.96) | 1.14 (0.97-1.32)    | 0.9 (0.81-1)          | 1.04 (0.93-1.16)    | 1 (0.86-1.16)                   |
| Fatal acidosis/serious infection | Reference      | 1.27 (1.01-1.62) | 0.78 (0.6-1.02)  | 1.03 (0.71-1.48)    | 0.73 (0.55-0.97)      | 1.1 (0.83-1.45)     | 0.88 (0.57-1.32)                |
| All-cause mortality              | Reference      | 1.12 (1.02-1.23) | 0.76 (0.69-0.84) | 0.99 (0.85-1.14)    | 0.88 (0.8-0.98)       | 0.96 (0.86-1.07)    | 1.01 (0.86-1.17)                |

\*Non-proportional hazards, group excluded from analysis.

Adjustments were made for age, sex, diabetes duration, HbA1c, non-HDL-C, BMI, smoking, eGFR, multi-dose dispensation, previous hospitalisation, history of CVD and CHF, microalbuminuria, and treatment with antihypertensive agents, lipid lowering agents and cardiac glycosides.

Appendix Table 5. Adjusted hazard ratios with 95 % confidence intervals for any CVD, fatal CVD, any acidosis/serious infection, fatal acidosis/serious infection, and all-cause mortality in patients with SU only and patients with metformin only as reference

|                                  | <b>SU only</b>         | <b>Metformin Only</b>  | <b>SU only Vs Metformin only</b>        |
|----------------------------------|------------------------|------------------------|-----------------------------------------|
|                                  | Events/Patients<br>N/N | Events/Patients<br>N/N | Hazard ratio<br>(95% CI)<br><br>P-value |
| Any CVD                          | 788 / 4084             | 1734 / 14317           | 0.99 (0.89-1.09) 0.82                   |
| Fatal CVD                        | 210 / 4272             | 264 / 14696            | 1.01 (0.82-1.25) 0.91                   |
| Any acidosis/serious infection   | 506 / 4178             | 1154 / 14517           | 1.0 (0.89-1.14) 0.96                    |
| Fatal acidosis/serious infection | 94 / 4272              | 127 / 14697            | 1.17 (0.85-1.60) 0.34                   |
| All-cause mortality              | 664 / 4272             | 971 / 14697            | 1.15 (1.02-1.30) 0.019                  |

Adjusted by stratification with octiles of propensity scores.

Appendix Table 6. Adjusted hazard ratios (HR) with 95% confidence intervals (CI) and p-values for any CVD, fatal CVD, any acidosis/serious infection, fatal acidosis/serious infection, and all-cause mortality in patients treated with insulin + other OHA or insulin + metformin, and with insulin only as reference

|                                  | Insulin only |                  | Insulin + other OHA |         | Insulin + metformin |         |
|----------------------------------|--------------|------------------|---------------------|---------|---------------------|---------|
|                                  | Reference    | HR (95% CI)      | HR (95% CI)         | P-value | HR (95% CI)         | P-value |
| Any CVD                          | Reference    | 1.10 (0.98-1.23) | 1.10 (0.98-1.23)    | 0.1154  | 0.96 (0.89-1.03)    | 0.2823  |
| Fatal CVD                        | Reference    | 0.84 (0.67-1.05) | 0.84 (0.67-1.05)    | 0.1334  | 0.90 (0.77-1.05)    | 0.1687  |
| Any acidosis/serious infection   | Reference    | 0.96 (0.84-1.1)  | 0.96 (0.84-1.1)     | 0.5976  | 0.86 (0.79-0.94)    | 0.0007  |
| Fatal acidosis/serious infection | Reference    | 0.82 (0.58-1.13) | 0.82 (0.58-1.13)    | 0.2413  | 0.85 (0.68-1.06)    | 0.1532  |
| All-cause mortality              | Reference    | 0.89 (0.78-1.01) | 0.89 (0.78-1.01)    | 0.0766  | 0.84 (0.76-0.91)    | <.0001  |

Adjustments were made for age, sex, diabetes duration, HbA1c, non-HDL-C, BMI, smoking, eGFR, multi-dose dispensation, previous hospitalisation, history of CVD and CHF, microalbuminuria, and treatment with antihypertensive agents, lipid lowering agents and cardiac glycosides.
