# Supplementary material for: Effectiveness and safety of metformin in 51 675 patients with type 2 diabetes and different levels of renal function: a cohort study from the Swedish National Diabetes Register
Source: PubMed Central journal article supplement — BMJ Open. 2012 Jul 13;2(4):e001076. doi: 10.1136/bmjopen-2012-001076 (PMC3400073; doi:10.1136/bmjopen-2012-001076), 2012-07-13
Supplement: bmjopen-2012-001076.draft_revisions.pdf [file bmjopen-2012-001076.draft_revisions.pdf]

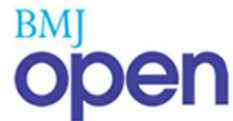

**Effectiveness and safety of metformin and other glucose-lowering treatments  
in 51 675 patients with type 2 diabetes:  
A cohort study from the Swedish National Diabetes Register  
(NDR)**

|                                 |                                                                                                                                                                                                                                                                                                                                                                                                                                                                                                                                                                                                                                                                                                                                                                                                                                                 |
|---------------------------------|-------------------------------------------------------------------------------------------------------------------------------------------------------------------------------------------------------------------------------------------------------------------------------------------------------------------------------------------------------------------------------------------------------------------------------------------------------------------------------------------------------------------------------------------------------------------------------------------------------------------------------------------------------------------------------------------------------------------------------------------------------------------------------------------------------------------------------------------------|
| Journal:                        | <i>BMJ Open</i>                                                                                                                                                                                                                                                                                                                                                                                                                                                                                                                                                                                                                                                                                                                                                                                                                                 |
| Manuscript ID:                  | bmjopen-2012-001076                                                                                                                                                                                                                                                                                                                                                                                                                                                                                                                                                                                                                                                                                                                                                                                                                             |
| Article Type:                   | Research                                                                                                                                                                                                                                                                                                                                                                                                                                                                                                                                                                                                                                                                                                                                                                                                                                        |
| Date Submitted by the Author:   | 04-Mar-2012                                                                                                                                                                                                                                                                                                                                                                                                                                                                                                                                                                                                                                                                                                                                                                                                                                     |
| Complete List of Authors:       | Ekström, Nils; University of Gothenburg, Department of Medicine<br>Schiöler, Linus; Center of Registers in Region Västra Götaland, ; University of Gothenburg, Department of Public Health and Community Medicine<br>Svensson, Ann-Marie; Center of Registers in Region Västra Götaland, Eeg-Olofsson, Katarina; University of Gothenburg, Department of Medicine<br>Miao Jonasson, Junmei; Center of Registers in Region Västra Götaland, Zethelius, Bjorn.; Uppsala University, Public Health/Geriatrics<br>Cederholm, Jan; Uppsala University, Department of Public Health and Caring Sciences / Family Medicine and Clinical Epidemiology<br>Gudbjörnsdottir, Soffia; University of Gothenburg, Department of Medicine; Center of Registers in Region Västra Götaland,<br>Eliasson, Björn; University of Gothenburg, Department of Medicine |
| <b>Primary Subject Heading</b>: | Diabetes and endocrinology                                                                                                                                                                                                                                                                                                                                                                                                                                                                                                                                                                                                                                                                                                                                                                                                                      |
| Secondary Subject Heading:      | Epidemiology, Pharmacology and therapeutics, Cardiovascular medicine                                                                                                                                                                                                                                                                                                                                                                                                                                                                                                                                                                                                                                                                                                                                                                            |
| Keywords:                       | Diabetes & endocrinology < INTERNAL MEDICINE, EPIDEMIOLOGY, THERAPEUTICS, Vascular medicine < INTERNAL MEDICINE, Adverse events < THERAPEUTICS                                                                                                                                                                                                                                                                                                                                                                                                                                                                                                                                                                                                                                                                                                  |
|                                 |                                                                                                                                                                                                                                                                                                                                                                                                                                                                                                                                                                                                                                                                                                                                                                                                                                                 |

SCHOLARONE™  
Manuscripts

Effectiveness and safety of metformin and other glucose-lowering treatments

in 51 675 patients with type 2 diabetes:

A cohort study from the Swedish National Diabetes Register (NDR)

Authors

Nils Ekström<sup>1</sup>, Linus Schiöler<sup>1,2</sup>, Ann-Marie Svensson<sup>1</sup>, Katarina Eeg-Olofsson<sup>3</sup>, Junmei Miao Jonasson<sup>1</sup>, Björn Zethelius<sup>4</sup>, Jan Cederholm<sup>5</sup>, Soffia Gudbjörnsdottir<sup>1,3</sup>, Björn Eliasson<sup>3</sup>

Affiliations

1 Centre of Registers in Region Västra Götaland, Gothenburg, Sweden

2 Department of Public Health and Community Medicine, Sahlgrenska Academy, University of Gothenburg, Sweden

3 Department of Medicine, Sahlgrenska Academy, University of Gothenburg, Sweden

4 Department of Public Health and Caring Sciences / Geriatrics, Uppsala University and Medical Products Agency, Uppsala, Sweden

5 Department of Public Health and Caring Sciences / Family Medicine and Clinical Epidemiology, Uppsala University, Sweden

Authors' addresses

Nils Ekström (medical student), Department of Medicine, Sahlgrenska University Hospital, University of Gothenburg, 413 45 Göteborg, Sweden. Linus schiöler (PhD), Department of Public Health and Community Medicine, Sahlgrenska Academy, University of Gothenburg, Box 414, 405 30 Göteborg, Sweden. Ann-Marie Svensson (RN, PhD), National Diabetes Register, Registercentrum VGR, 413 45 Göteborg, Sweden. Katarina Eeg-Olofsson (MD, PhD) Department of Medicine, Sahlgrenska University Hospital, University of Gothenburg, 413 45 Göteborg, Sweden. Junmei Miao Jonasson (MD, PhD), National Diabetes Register, Registercentrum VGR, 413 45 Göteborg, Sweden. Björn Zethelius (MD, PhD, Assoc. prof.) Geriatrics Section, Department of Public Health and Caring Sciences, Uppsala University, Box 564, 751 22 Uppsala, Sweden. Jan Cederholm (MD, PhD, Assoc. prof.) Family Medicine and Clinical Epidemiology Section, Department of Public Health and Caring Sciences, Uppsala University, BMC, Box 564, 751 22 Uppsala, Sweden. Soffia Gudbjörnsdottir (MD, PhD, Assoc.

1  
2  
3 prof.), Department of Medicine, Sahlgrenska University Hospital, University of Gothenburg,  
4  
5 413 45 Göteborg, Sweden. Björn Eliasson (MD, PhD, Prof), Department of Medicine,  
6  
7 Sahlgrenska University Hospital, University of Gothenburg, 413 45 Göteborg, Sweden.  
8  
9  
10

11  
12 Corresponding author

13  
14 Nils Ekström

15  
16 Phone: +46 (0)70 2890121

17  
18 E-mail: nils.ekstrom@gu.se  
19  
20  
21

22  
23  
24 Word count                      Abstract      256  
25                                              Body        3171  
26  
27  
28  
29  
30  
31  
32  
33  
34  
35  
36  
37  
38  
39  
40  
41  
42  
43  
44  
45  
46  
47  
48  
49  
50  
51  
52  
53  
54  
55  
56  
57  
58  
59  
60

## Abstract

**Objective:** To evaluate the risks of cardiovascular disease (CVD), lactic acidosis, serious infections and mortality in a large sample of pharmacologically treated patients with type 2 diabetes in clinical practice, with particular emphasis on metformin.

**Design:** Population-based retrospective cohort study.

**Setting:** Hospital outpatient clinics and primary care in Sweden between July 2004 and December 2010.

**Participants:** 51675 men and women with type 2 diabetes, registered in the Swedish National Diabetes Register (NDR), and on continuous glucose-lowering treatment.

**Main outcome measures:** Risks of CVD, acidosis/serious infection and all-cause mortality, associated with each treatment regimens, were analysed in all patients and in subgroups with different estimated glomerular filtration rate (eGFR) intervals. Covariance adjustment and propensity scores were used to adjust for baseline covariates.

**Results:** Insulin in monotherapy showed an increased risk of fatal/non-fatal CVD and all-cause mortality compared to metformin in monotherapy, hazard ratio (HR) 1.18 (95 % confidence interval: 1.07 to 1.29) and 1.34 (1.19 to 1.50), respectively. Metformin showed a reduced risk of any acidosis/serious infection, HR 0.85 (0.74 to 0.97), and all-cause mortality, 0.87 (0.77 to 0.99) in patients with eGFR 45-60 mL/min/1.73 m<sup>2</sup>, and was not associated with increased risk of all-cause mortality, acidosis/serious infection or CVD in patients with renal impairment.

**Conclusions:** Metformin-based therapies were associated with reduced risks of severe endpoints, also after different adjustments for patient characteristics. Results were consistent in patients with renal impairment, and no increased risk of acidosis/serious infection was seen. In clinical practice, the benefits of metformin use clearly outbalance the risk of severe side effects.

1  
2  
3 Article summary  
4  
5

6 **Article focus**  
7

8 To evaluate the risks of cardiovascular disease (CVD), acidosis/serious infection and  
9 mortality associated with metformin and other glucose-lowering treatments, in a cohort of  
10 51 675 type 2 diabetes patients, and in subgroups with different degrees of renal  
11 impairment.  
12  
13

14 **Key messages**  
15

16  
17 Metformin was associated with reduced risk of CVD, acidosis/serious infection and all-cause  
18 mortality compared to insulin, and a reduced risk of all-cause mortality compared to other  
19 oral hypoglycemic agents.  
20  
21

22 The effects were consistent in patients with renal impairment (eGFR 45-60 mL/min/1.73 m<sup>2</sup>),  
23 and there were no increased risk of acidosis/serious infection even in patients with low renal  
24 function.  
25  
26

27 **Strengths and limitations of this study**  
28

29 A large cohort with comprehensive data on patient characteristics was studied.  
30  
31

32 A composite endpoint including diagnosis of acidosis, shock, acute renal failure and serious  
33 infections was used to evaluate the occurrence of lactic acidosis.  
34  
35  
36  
37  
38  
39  
40  
41  
42  
43  
44  
45  
46  
47  
48  
49  
50  
51  
52  
53  
54  
55  
56  
57  
58  
59  
60

## Introduction

Type 2 diabetes mellitus (DM2) is a common disease, which causes major morbidity and mortality due to micro- and macrovascular complications (1). A range of glucose lowering agents with different properties aims at preventing these complications. The UK Prospective Diabetes Study (UKPDS) demonstrated a reduction in cardiovascular disease (CVD) and all-cause mortality in the subgroup of obese DM2 patients treated with metformin compared to sulfonylureas, insulin or diet alone (2, 3). Further beneficial effects with metformin have also been recognized (4, 5). On account of this, international treatment guidelines recommend metformin as first line pharmacological treatment in DM2 patients (6-9).

Metformin have been considered causing increased risk of lactic acidosis. Consequently, metformin treatment have been contraindicated in patients at risk of developing lactic acidosis, e.g. patients with cardiovascular and renal disease (10). Given the high prevalence of micro- and macrovascular disease in the DM2 population (11), a relatively large proportion was comprehended by the contraindications. However, several studies have suggested this concern to be exaggerated (12-14).

In the light of these findings, most guidelines have become less strict towards metformin treatment in these patients (6, 8). However, there is still a great need for clinical and epidemiological studies investigating the overall effects of metformin in patients considered vulnerable to such treatment. Therefore, the aim of this survey was to investigate benefits and risks associated with different glucose-lowering medications, in a cohort of 51 675 DM2 patients in clinical practice, and in subgroups of patients with different degrees of renal impairment.

## Material and Methods

In this population-based, longitudinal study information was linked from four national registers in Sweden; the national diabetes register (NDR), the prescribed drug register (15), the patient register, and the cause of death register (16, 17). NDR is based and administered in Göteborg, Sweden. Since the establishment in 1996, NDR has been working with systematic quality improvement, research and development in the field of Diabetes Mellitus.

1  
2  
3 In 2009, NDR covered 262 333 patients with type 1 diabetes mellitus (DM1) and DM2 (18-  
4 21). Physicians and nurses in hospital outpatient clinics and primary health care clinics report  
5 to the NDR at least annually, via the Internet or via direct transfer of data from medical  
6 records databases. All included patients have agreed to be registered before inclusion.  
7  
8  
9

### 10 11 12 13 Study population

14 This study, approved by the central ethical review board at the University of Gothenburg,  
15 comprises 51 675 DM2 patients. All DM2 patients aged  $\geq 40$  to  $< 85$  years, and registered in  
16 the NDR between July 1, 2004 and December 31, 2007 were eligible for inclusion in the  
17 study (Appendix Figure 1). DM2 was defined as treatment with diet only, or oral  
18 hypoglycemic agents (OHA) only, or onset age of diabetes  $\geq 40$  years and treatment with  
19 insulin only or combined with OHA. Patients had to be registered in the NDR one year prior  
20 to and one year following their first prescription of glucose-lowering treatment. In order to  
21 achieve adequate length of the follow up period, they had to be initiated on glucose-  
22 lowering treatment before 2007 to be included.  
23  
24  
25  
26  
27  
28  
29  
30  
31  
32

33 Baseline occurred twelve months after the first prescription of glucose-lowering medication.  
34 Only patients who had filled at least three prescriptions or 18 fills of multi-dose dispensed  
35 drugs during this twelve months period were included in the study. Patients who had  
36 collected both ordinary prescriptions and multi-dose dispensed drugs were excluded. Thus,  
37 twelve months of continuous glucose-lowering medication at baseline was ensured. The  
38 patients were classified according to glucose-lowering treatment, and clinical characteristics  
39 were analysed at baseline. Patients missing values for baseline characteristics were excluded  
40 from the analysis. Other OHA consisted of patients treated with all OHAs other than  
41 metformin. The vast majority of this group, however, was treated with sulphonylureas (SU).  
42  
43  
44  
45  
46  
47  
48  
49  
50  
51

### 52 53 Baseline

54 Variables assessed at baseline are presented in Table 1. History of congestive heart failure  
55 (CHF), and CVD were defined as at least one event of CHF or CVD respectively, anytime  
56 between the year of 1987 and the start of the study. History of serious infections was  
57 defined as at least one severe infection within six months prior to baseline, and the variable  
58  
59  
60

1  
2  
3 previous hospitalization as hospitalization for at least three consecutive days within six  
4 months prior to baseline.  
5  
6  
7

8  
9 The patients were screened using local methods, but guidelines were available to ensure the  
10 use of similar methodology in all centres. Body mass index (BMI) was calculated as weight in  
11 kilograms divided by height in meters squared. A smoker was a patient smoking one or more  
12 cigarettes per day, or a pipe daily, or who had stopped smoking within the past three  
13 months. Cumulative microalbuminuria was defined as urine albumin excretion  $>20 \mu\text{g}/\text{min}$   
14 in two out of three consecutive tests. Laboratory analyses, including total cholesterol (TC)  
15 and HDL-Cholesterol (HDL-C) were carried out at local laboratories. HbA1c analyses are  
16 quality assured in Sweden by regular calibration with Mono-S, a HPLC method. HbA1c values  
17 were converted to the National Glycohemoglobin Standardization Program (NGSP) standard  
18 levels (22). Non-HDL-cholesterol (non-HDL-C) was calculated by subtracting HDL-C from TC.  
19 Estimated glomerular filtration rate (eGFR) was calculated using the MDRD (Modification of  
20 Diet in Renal Disease) equation (23).  
21  
22  
23  
24  
25  
26  
27  
28  
29  
30  
31

### 32 Follow up

33 All patients were followed from baseline until the occurrence of an endpoint event, or  
34 otherwise, until censor date of December 31, 2010. Patients who experienced an endpoint  
35 event between first prescription and baseline were excluded from the analysis of that  
36 specific endpoint. Patients changing treatment during the study were not censored, and  
37 endpoint events were attributed the on-going treatment at the time of the event. Mean  
38 follow up was 3.9 years. The five endpoints analysed were fatal/non-fatal CVD, fatal CVD,  
39 acidosis/serious infection, fatal acidosis/serious infection and all-cause mortality. CVD was  
40 defined as diagnosis of myocardial infarction, angina pectoris, intracerebral haemorrhage,  
41 cerebral infarction, unspecified stroke, peripheral vascular disease (PVD), or intervention  
42 with percutaneous coronary intervention (PCI) or coronary artery bypass grafting (CABG),  
43 whichever occurred first. Acidosis/serious infection was defined as diagnosis of acidosis,  
44 serious infection, shock, or acute renal failure, which were regarded as signs of lactic  
45 acidosis. Serious infections requiring hospitalization for anti-infectious treatment as well as  
46 acidosis, shock, and acute renal failure requiring treatment in hospital, usually intensive care  
47 thus, registered in the inpatient register, were included in the composite endpoint. The  
48  
49  
50  
51  
52  
53  
54  
55  
56  
57  
58  
59  
60



1  
2  
3 international classifications of diseases-10 codes for all endpoints are given in Appendix  
4  
5 Materials. Fatality was defined as an event followed by death in the subsequent 28 days.  
6  
7

## 8 9 Statistical Methods

10 Baseline characteristics were compared, unadjusted, using ANOVA and logistic regression  
11 (Table 1). Propensity scores were estimated using boosted CART (24), since logistic  
12 regression did not achieve good balance. Baseline characteristics were then compared using  
13 logistic regression or OLS regression, adjusted for octiles of the propensity score (Appendix  
14 Table 1). Unadjusted survival of the endpoints by treatment groups in all patients was  
15 estimated with the Kaplan-Meier estimator (Figure 1).  
16  
17  
18  
19  
20  
21  
22  
23

24 Cox regression models were used to estimate hazard ratios (HR) for all endpoints in groups  
25 of patients with different glucose-lowering treatments, and metformin only as reference.  
26 Adjustments were made for age, sex, diabetes duration, HbA1c, non-HDL-C, BMI, smoking,  
27 eGFR, multi-dose dispensation, previous hospitalization, history of CVD and CHF,  
28 microalbuminuria, and treatment with antihypertensive agents, lipid lowering agents and  
29 cardiac glycosides (Table 3). HR were also estimated in patients with insulin only or other  
30 OHA only compared to metformin only, adjusted by stratification for octiles of propensity  
31 scores as described above (Table 5). HR were estimated in subgroups with different eGFR  
32 intervals (Table 6), for metformin, insulin or other OHA, with any other glucose-lowering  
33 treatment as reference. Adjustment was made for same covariates as in Table 3.  
34  
35  
36  
37  
38  
39  
40  
41  
42  
43  
44

45 Functional form of continuous covariates were checked using a Kolmogorov-type supremum  
46 test (25) and in some models it was found suitable to add a quadratic term for age or  
47 diabetes duration. The proportional hazards (PH) assumption was checked by including the  
48 interaction between covariates and log of follow up time. Violations of the PH assumption  
49 were handled by stratifying on the violating covariate, or by modelling the effect as time  
50 dependent (26). Additional checks of the form of the time dependence were made using  
51 plots of scaled Schoenfeld residuals (27).  
52  
53  
54  
55  
56  
57  
58  
59  
60

All statistical analyses were performed with SAS version 9.2 (SAS Institute, Cary, NC, USA),  
except Kaplan-Meier curves produced in SPSS version 18 (SPSS Inc., Chicago, USA), and

1  
2  
3 propensity scores estimated using the package TWANG in R (R Foundation for Statistical  
4 Computing, Vienna, Austria). A two-sided P-value < 0.05 was considered statistically  
5 significant.  
6  
7  
8  
9

#### 10 Role of the funding source

11 The Region Västra Götaland and the Swedish Association of Local Authorities and Regions  
12 fund the NDR. This study was also supported by an unrestricted research grant from BMS,  
13 France. The funders had no role in study design, data collection and analysis, decision to  
14 publish, or preparation of the manuscript.  
15  
16  
17  
18  
19  
20  
21  
22  
23

#### 24 Results

##### 25 Patients

26 Table 1 gives the distribution between treatments and clinical characteristics at baseline,  
27 unadjusted. The total population presented a mean ( $\pm$ SD) age of  $65.3\pm 9.8$  years with mean  
28 diabetes duration of  $9.4\pm 8.0$  years, and a mean HbA1c of  $7.3\pm 3.3$  %. The proportion of  
29 females were 41.9 % and 14.0 % of the population were smokers. Mean BMI was  $29.5\pm 5.1$   
30  $\text{kg/m}^2$ , mean systolic blood pressure 140 mmHg, mean Non-HDL 3.5 mmol/L, and mean  
31 eGFR  $78.1\pm 21.9$  mL/min/1.73  $\text{m}^2$ . 21.4 % had history of CVD, 5.9 % history of CHF, and 2.9 %  
32 history of serious infections. There were statistically significant differences between the  
33 groups in all variables. Patients on insulin-based treatments presented longer diabetes  
34 duration, higher mean HbA1c, more often microalbuminuria and history of CVD, CHF and  
35 serious infections than the population in general.  
36  
37  
38  
39  
40  
41  
42  
43  
44  
45  
46  
47  
48  
49

50 Patients treated with metformin generally presented high eGFR and BMI. Patients on  
51 metformin in monotherapy were the youngest participants, with the shortest diabetes  
52 duration, and had a low mean HbA1c. They also relatively seldom had history of CVD, CHF or  
53 serious infections. Patients treated with other OHA in monotherapy presented the highest  
54 mean age, the lowest mean HbA1c and the lowest mean BMI. After adjustment with  
55 propensity score, all differences in baseline characteristics except for history of CHF, and  
56 BMI were erased (Appendix Table 1). CHF and BMI were further adjusted for with  
57 stratification and as a covariate, respectively.  
58  
59  
60

1  
2  
3 Table 2 gives time of exposure to the glucose-lowering agents and proportions of patients  
4 changing treatment, in each group. The proportions changing treatment ranged between  
5 56.5 % and 93.9 %. Comparison of baseline characteristics in patients who changed  
6 treatment and patients who did not change treatment, showed significant differences, with  
7 e.g. more frequent history of CVD, CHF and serious infections in patients who did not change  
8 treatment, ( $P < 0.05$ ).

## 16 Outcomes

17  
18 Figure 1 shows unadjusted time to an event of all-cause mortality, any CVD, and any  
19 acidosis/serious infection in each treatment group. The steepest decreases of curves were  
20 seen with insulin only and insulin in combination with other OHA. Table 3 gives HR with 95 %  
21 confidence intervals (CI) for all endpoints, adjusted for covariates as given in the Table. All  
22 treatments were associated with significantly increased risks of all-cause mortality and any  
23 CVD compared to metformin only, with HR ranging from 1.47 (95 % CI: 1.35 to 1.61) to 1.15  
24 (1.05 to 1.27) for all-cause mortality and from 1.40 (1.24 to 1.58) to 1.11 (1.03 to 1.20) for  
25 any CVD. Insulin only and other OHA only also showed a significantly increased risk of fatal  
26 CVD. All treatments except metformin in combination with other OHA were associated with  
27 a significantly increased risk of any acidosis/serious infection, and insulin only or in  
28 combination with metformin showed an increased risk of fatal acidosis/serious infection.  
29 Relatively few fatal events occurred during follow-up (Table 4), contributing to the wider  
30 confidence intervals for these risk estimates.

31  
32  
33  
34  
35  
36  
37  
38  
39  
40  
41  
42  
43  
44  
45 Table 5 gives HR with 95 % CI for all endpoints with insulin only or other OHA only compared  
46 to metformin only, adjusted for propensity score. Insulin was associated with significantly  
47 increased risks of any CVD, HR 1.18 (1.07 to 1.29), all-cause mortality, HR 1.34 (1.19 to 1.50),  
48 and also acidosis/serious infection and fatal acidosis/serious infection, HR 1.28 (1.14 to 1.43)  
49 and 1.45 (1.07 to 1.97). When comparing other OHA only to metformin only, a borderline  
50 significantly increased risk was seen for all-cause mortality, HR 1.13 (1.01 to 1.27).

51  
52  
53  
54  
55  
56  
57  
58 Table 6 gives HR with 95 % CI for any CVD, any acidosis/serious infection and all-cause  
59 mortality, in subgroups of patients with different eGFR intervals, adjusted for covariates as  
60 given in the Table. Treatments with metformin, insulin, or other OHA in any combination

1  
2  
3 were compared to any other treatment. Metformin-based treatments were associated with  
4 reduced risks of any acidosis/serious infection HR 0.85 (0.74 to 0.97) and all-cause mortality  
5 HR 0.87 (0.77 to 0.99) in the subgroup of patients with eGFR 45-60 mL/min/1.73 m<sup>2</sup>. Similar  
6 results were seen in the subgroup with eGFR >60 mL/min/1.73 m<sup>2</sup>, HR 0.91 (0.84 to 0.98) for  
7 any acidosis/serious infection and 0.87 (0.81 to 0.94) for all-cause mortality. Both insulin and  
8 other OHA were associated with increased risk of all-cause mortality in patients with eGFR  
9 >60 mL/min/1.73 m<sup>2</sup>. Insulin was also associated with increased risk of any acidosis/serious  
10 infection in patients with eGFR 30-45, or >60 mL/min/1.73 m<sup>2</sup>, and increased risk of any CVD  
11 in patients with eGFR 30-45, 45-60, or >60 mL/min/1.73 m<sup>2</sup>.  
12  
13  
14  
15  
16  
17  
18  
19  
20  
21  
22  
23

## 24 Discussion

25  
26 This population-based observational study demonstrates pronounced beneficial effects of  
27 metformin in clinical practice. As expected, there were significant differences in clinical  
28 characteristics between the groups. These differences, however, disappeared after  
29 adjustment with propensity scores. Still, metformin in monotherapy showed a significantly  
30 reduced risk of any CVD, all-cause mortality, any acidosis/serious infection and fatal  
31 acidosis/serious infection compared to insulin in monotherapy. A borderline significant risk  
32 reduction of all-cause mortality was also shown compared to other OHA in monotherapy.  
33  
34  
35  
36  
37  
38  
39  
40

41 The increased risk associated with insulin treatment could be due to these patients  
42 presenting a more severe disease. However, an increased risk caused by insulin *per se*  
43 cannot be ruled out. Others have reported similar effects associated with insulin treatment  
44 (28-33), but the literature is not consistent in this matter (34-36). Results from a large clinical  
45 trial investigating the effects of insulin treatment on CVD (37) are expected to be presented  
46 in the near future, and will hopefully bring clarity in this matter.  
47  
48  
49  
50  
51  
52  
53

54 The beneficial effects of metformin, shown in this survey, are consistent with previous  
55 findings. The UKPDS demonstrated a reduction in all-cause mortality in the sub-group of  
56 obese DM2 patients treated with metformin compared to diet, insulin or SU (2). The  
57 sustainability of the effect was confirmed in a ten-year post-interventional follow-up (3).  
58  
59  
60 Another clinical trial indicated reduced risk of macrovascular events in insulin treated DM2

1  
2  
3 patients when adding metformin compared to placebo (5).  
4  
5

6  
7 Subgroup analyses with patients presenting different degrees of renal impairment were  
8 conducted, and did not show any increased risk of CVD, acidosis/serious infection or all-  
9 cause mortality associated with metformin-based treatments in patients with eGFR 30-45,  
10 45-60, or >60 mL/min/1.73 m<sup>2</sup>. Rather, metformin-based treatments were associated with  
11 reduced risks of all cause mortality and acidosis/serious infection in patients with eGFR 45-  
12 60 or >60 mL/min/1.73 m<sup>2</sup>. The prevalence of renal impairment differed between the  
13 groups, with patients presenting an eGFR <45 mL/min/1.73 m<sup>2</sup> being rare in metformin-  
14 based treatments. However, the prevalence of eGFR 45-60 mL/min/1.73 m<sup>2</sup> ranged between  
15 10.7 % and 14.4 % in these patients (Table 1), and did not differ much from other patients.  
16 Consequently, the subgroup with eGFR 45-60 mL/min/1.73 m<sup>2</sup> was based on a surprisingly  
17 large material, while the subgroup with eGFR 30-45 mL/min/1.73 m<sup>2</sup> constituted relatively  
18 few patients.  
19  
20  
21  
22  
23  
24  
25  
26  
27  
28  
29  
30

31 A recently published observational study (14) examined the effects of metformin in patients  
32 with advanced cardiovascular disease, thus considered vulnerable to metformin. The results  
33 indicated significantly reduced risk of all cause mortality in patients treated with metformin  
34 compared to other glucose-lowering treatments. Results were consistent in a subgroup of  
35 patients with renal impairment (eGFR 30-60 mL/min/1.73 m<sup>2</sup>). The survey, however, only  
36 analysed all-cause mortality, and could therefore not detect potential cases of lactic acidosis.  
37 Furthermore, glucose-lowering treatments were only specified as metformin use or not, and  
38 no adjustments for crucial covariates such as HbA1c or diabetes duration were made.  
39 Several studies have failed to demonstrate increased incidence rate of lactic acidosis in DM2  
40 patients treated with metformin. Thus, DM2 with its comorbidities or any glucose lowering  
41 treatment rather than metformin use *per se* have been suggested to be risk factors for lactic  
42 acidosis (12).  
43  
44  
45  
46  
47  
48  
49  
50  
51  
52  
53  
54  
55

56 The large population, 51 675 DM2 patients, and comprehensive adjustments for covariates  
57 are apparent strengths of the present survey. Data are collected from the NDR database  
58 with a currently estimated coverage of more than 90 % of all patients in hospital outpatient  
59 clinics and almost 80 % of all patients in primary care in Sweden, suggesting it to be highly  
60

1  
2  
3 representative of clinical practice. Risk calculations were made, adjusted for covariates with  
4 propensity scores and in Cox regression models. The propensity score achieved perfectly  
5 well balanced groups regarding baseline characteristics indicating the robustness of this  
6 statistical analysis. The Cox regression models enabled more comprehensive comparisons  
7 between several glucose-lowering regimens. We also presented exposure time for the  
8 different glucose-lowering treatments, but unfortunately there was no useful information  
9 about doses.  
10  
11

12  
13  
14  
15  
16  
17 Despite comprehensive adjustments, covariates of possible importance could have been  
18 missed. Thus, the presence of allocation bias may not be fully avoided. Furthermore,  
19 patients who changed glucose-lowering treatment during the study were not censored. It  
20 could be that patients with advancing disease more frequently changed to a specific glucose-  
21 lowering medication, diluting the results observed. Comparison of baseline characteristics  
22 indicated higher proportions of history of CVD, CHF and serious infections in patients  
23 changing treatment. This could have affected the results, even though the proportions of  
24 patients changing treatment were high in all groups. Very few events of diagnosed lactic  
25 acidosis occurred during the follow-up, and thus analyses with lactic acidosis as an endpoint  
26 would not provide desirable strength. Therefore, a composite endpoint (acidosis/serious  
27 infections) including diagnosis of acidosis (n=167), shock (n=17), acute renal failure (n=914)  
28 and serious infections (n=4782), was used. This complicates the evaluation of lactic acidosis  
29 *per se*, although this diagnosis in practice only occurs in combination with severe infections  
30 or CVD. Furthermore, lactic acidosis reported with use of biguanides mostly involve  
31 phenformine, which was withdrawn from the market, as lactic acidosis was 20 times more  
32 frequent than with metformin (38). The patient group treated with other OHA, were mainly  
33 treated with SU and to a very limited degree with glitazones, acarbose or DPP-4 inhibitors  
34 during the study period. Investigation of the individual effectiveness of these agents would  
35 however be of interest in the future.  
36  
37  
38  
39  
40  
41  
42  
43  
44  
45  
46  
47  
48  
49  
50  
51  
52  
53  
54

55 In conclusion, this nation-wide observational study of 51 675 DM2 patients supports the  
56 previously observed effectiveness of metformin. Metformin was associated with reduced  
57 risk of all-cause mortality compared to both insulin and other OHA, and for several  
58 additional endpoints compared to insulin. The results were consistent in a subgroup of  
59  
60

1  
2  
3 patients with renal impairment, and no increased risk of acidosis/serious infection was seen.  
4  
5 Together with previous findings, this constitutes evident support to the less strict approach  
6  
7 to metformin treatment in patients with renal impairment, advocated in most guidelines.  
8  
9 Thus, considerably more DM2 patients may be considered for treatment with metformin.  
10  
11  
12  
13  
14  
15  
16  
17  
18  
19  
20  
21  
22  
23  
24  
25  
26  
27  
28  
29  
30  
31  
32  
33  
34  
35  
36  
37  
38  
39  
40  
41  
42  
43  
44  
45  
46  
47  
48  
49  
50  
51  
52  
53  
54  
55  
56  
57  
58  
59  
60

For peer review only

### Data sharing

No additional data available.

### Copyright statement

I [Nils Ekström] the Corresponding Author of this article contained within the original manuscript which includes any diagrams & photographs, other illustrative material, video, film or any other material howsoever submitted by the Contributor(s) at any time and related to the Contribution (“the Contribution”) have the right to grant on behalf of all authors and do grant on behalf of all authors, a licence to the BMJ Publishing Group Ltd and its licensees, to permit this Contribution (if accepted) to be published in BMJ Open and any other BMJ Group products and to exploit all subsidiary rights, as set out in the licence at: ([http://group.bmj.com/products/journals/instructions-for-authors/BMJOpen\\_licence.pdf](http://group.bmj.com/products/journals/instructions-for-authors/BMJOpen_licence.pdf))

### Author contributions

NE, LS, BZ, JC, AMS, JMJ, KEO, SG and BE contributed to the conception and design. LS, JC and AMS contributed to the acquisition of data and performed the calculations. LS, NE, JC, BZ, SG, AMS and BE contributed to the analysis and interpretation of data. NE and BE contributed to drafting the article. NE, BE, BZ, JZ, AMS, LS, KEO, SG and JMJ contributed to revising the article critically for important intellectual content and final approval of the version to be submitted.

### Acknowledgements

We thank the patients, regional NDR coordinators and all participating nurses and physicians. The NDR is supported by the Swedish Society for Diabetology, and the Swedish Diabetes Association.

### Funding

The Region Västra Götaland and the Swedish Association of Local Authorities and Regions fund the NDR. This study was also supported by an unrestricted research grant from BMS, France. The funders had no role in study design, data collection and analysis, decision to publish, or preparation of the manuscript.



1  
2  
3 Conflict of interest  
4

5 BE has served as a lecturer for all pharmacological companies manufacturing glucose  
6 lowering agents and participated in advisory boards for Eli Lilly Sweden AB and Eli Lilly & Co,  
7 Sanofi-aventis, Sweden, Boehringer Ingelheim AB, Sweden, and MSD, Sweden.  
8  
9

10  
11  
12  
13 Disclaimer

14 Björn Zethelius (BZ) is employed by the Medical Products Agency (MPA), Uppsala Sweden.

15 BZ has not received any financial support or other benefits from BMS France or any  
16 commercial sponsor. Results and views of the present study represent the authors and not  
17 necessarily any official views of the MPA where BZ is employed.  
18  
19  
20  
21  
22  
23  
24  
25  
26  
27  
28  
29  
30  
31  
32  
33  
34  
35  
36  
37  
38  
39  
40  
41  
42  
43  
44  
45  
46  
47  
48  
49  
50  
51  
52  
53  
54  
55  
56  
57  
58  
59  
60

## Figure legends

Table 1: Baseline characteristics in all 51,675 type 2 diabetes patients and in groups based on glucose-lowering treatments. Means  $\pm$  one standard deviation (SD) and frequencies (%) are given. There were statistically significant differences ( $p < 0.001$ ) in all variables between the groups.

Table 2: Time of exposure (months) to specific glucose-lowering agents, and proportions changing treatment (%) in each group.

Table 3: Adjusted hazard ratios (HR) with 95% confidence intervals (CI) for any CVD, fatal CVD, any acidosis/serious infection, fatal acidosis/serious infection, and all-cause mortality in all patients, in each treatment group, and with metformin only as reference. Adjustments were made for age, sex, diabetes duration, HbA1c, non-HDL-C, BMI, smoking, eGFR, multi-dose dispensation, previous hospitalization, history of CVD and CHF, microalbuminuria, and treatment with antihypertensive agents, lipid lowering agents and cardiac glycosides.

Table 4: Numbers and frequencies (%) of endpoint events in each treatment group.

Table 5: Adjusted hazard ratios with 95 % confidence intervals for any CVD, fatal CVD, any acidosis/serious infection, fatal acidosis/serious infection, and all-cause mortality in patients with insulin only and patients with metformin only as reference, or in patients with other OHA only and patients with metformin only as reference. Each comparison was adjusted by stratification with octiles of propensity scores.

Table 6: Adjusted hazard ratios (HR) with 95% confidence intervals for any CVD, any acidosis/serious infection, and all-cause mortality in subgroups of patients with different eGFR intervals. HR associated with the examined agent in any combination is given with any other glucose-lowering treatment as reference. Adjustments were made for age, sex, diabetes duration, HbA1c, non-HDL-C, BMI, smoking, eGFR, multi-dose dispensation, previous hospitalization, history of CVD and CHF, microalbuminuria, and treatment with antihypertensive agents, lipid lowering agents and cardiac glycosides.

1  
2  
3 Figure 1: Time (months) to event of all-cause mortality (a), any CVD (b), and any  
4 acidosis/serious infection (c) in each treatment group, unadjusted.  
5  
6  
7  
8

9 Appendix Table 1: Baseline characteristics in groups of patients treated with metformin only,  
10 insulin only, or other OHA only, applied in Cox regression analyses presented in Table 5.  
11 Means  $\pm$  standard deviation (SD) and proportions (%) of clinical variables at baseline. P  
12 values are given for comparison between metformin only and insulin only, and between  
13 metformin only and other OHA only, unadjusted and after adjustment by stratification for  
14 octiles of propensity scores applied for each comparison.  
15  
16  
17  
18  
19  
20  
21

22 Appendix Figure 1: Enrollment of patients.  
23  
24  
25  
26  
27  
28  
29  
30  
31  
32  
33  
34  
35  
36  
37  
38  
39  
40  
41  
42  
43  
44  
45  
46  
47  
48  
49  
50  
51  
52  
53  
54  
55  
56  
57  
58  
59  
60

## References

1. Zimmet P, Alberti KG, Shaw J. Global and societal implications of the diabetes epidemic. *Nature*. 2001;414:782-7.
2. Effect of intensive blood-glucose control with metformin on complications in overweight patients with type 2 diabetes (UKPDS 34). UK Prospective Diabetes Study (UKPDS) Group. *Lancet*. 1998;352:854-65.
3. Holman RR, Paul SK, Bethel MA, et al. 10-year follow-up of intensive glucose control in type 2 diabetes. *N Engl J Med*. 2008;359:1577-89.
4. Kahn SE, Haffner SM, Heise MA, et al. Glycemic durability of rosiglitazone, metformin, or glyburide monotherapy. *N Engl J Med*. 2006;355:2427-43.
5. Kooy A, de Jager J, Lehert P, et al. Long-term effects of metformin on metabolism and microvascular and macrovascular disease in patients with type 2 diabetes mellitus. *Arch Intern Med*. 2009;169:616-25.
6. Nathan DM, Buse JB, Davidson MB, et al. Medical management of hyperglycemia in type 2 diabetes: a consensus algorithm for the initiation and adjustment of therapy: a consensus statement of the American Diabetes Association and the European Association for the Study of Diabetes. *Diabetes Care*. 2009;32:193-203.
7. Handelsman Y, Mechanick JI, Blonde L, et al. American Association of Clinical Endocrinologists Medical Guidelines for Clinical Practice for developing a diabetes mellitus comprehensive care plan. *Endocr Pract*. 2011;17 Suppl 2:1-53.
8. Type 2 Diabetes: National Clinical Guideline for Management in Primary and Secondary Care (Update). London: Royal College of Physicians of London.; 2008.
9. National guidelines for diabetes care. 2010 [cited 2011 June, 17]; Available from: <http://www.socialstyrelsen.se/nationalguidelines/nationalguidelinesfordiabetescare>.
10. Bailey CJ, Turner RC. Metformin. *N Engl J Med*. 1996;334:574-9.
11. Isomaa B, Almgren P, Tuomi T, et al. Cardiovascular morbidity and mortality associated with the metabolic syndrome. *Diabetes Care*. 2001;24:683-9.
12. Salpeter SR, Greyber E, Pasternak GA, et al. Risk of fatal and nonfatal lactic acidosis with metformin use in type 2 diabetes mellitus. *Cochrane Database Syst Rev*. 2010:CD002967.

- 1  
2  
3 13. Eurich DT, McAlister FA, Blackburn DF, et al. Benefits and harms of antidiabetic  
4 agents in patients with diabetes and heart failure: systematic review. *BMJ*. 2007;335:497.  
5
- 6  
7 14. Roussel R, Travert F, Pasquet B, et al. Metformin use and mortality among  
8 patients with diabetes and atherothrombosis. *Arch Intern Med*. 2010;170:1892-9.  
9
- 10  
11 15. Wettermark B, Hammar N, Fored CM, et al. The new Swedish Prescribed Drug  
12 Register--opportunities for pharmacoepidemiological research and experience from the first  
13 six months. *Pharmacoepidemiol Drug Saf*. 2007;16:726-35.  
14
- 15  
16 16. Merlo J, Lindblad U, Pessah-Rasmussen H, et al. Comparison of different  
17 procedures to identify probable cases of myocardial infarction and stroke in two Swedish  
18 prospective cohort studies using local and national routine registers. *Eur J Epidemiol*.  
19  
20 2000;16:235-43.  
21
- 22  
23 17. Tunstall-Pedoe H, Kuulasmaa K, Amouyel P, et al. Myocardial infarction and  
24 coronary deaths in the World Health Organization MONICA Project. Registration procedures,  
25 event rates, and case-fatality rates in 38 populations from 21 countries in four continents.  
26  
27 *Circulation*. 1994;90:583-612.  
28
- 29  
30 18. Eeg-Olofsson K, Cederholm J, Nilsson PM, et al. Risk of cardiovascular disease  
31 and mortality in overweight and obese patients with type 2 diabetes: an observational study  
32 in 13,087 patients. *Diabetologia*. 2009;52:65-73.  
33
- 34  
35 19. Eeg-Olofsson K, Cederholm J, Nilsson PM, et al. Glycemic control and  
36 cardiovascular disease in 7,454 patients with type 1 diabetes: an observational study from  
37 the Swedish National Diabetes Register (NDR). *Diabetes Care*. 2010;33:1640-6.  
38
- 39  
40 20. Eliasson B, Svensson AM, Miftaraj M, et al. Clinical use and effectiveness of  
41 lipid lowering therapies in diabetes mellitus-an observational study from the Swedish  
42 national diabetes register. *PLoS One*. 2011;6:e18744.  
43
- 44  
45 21. Lind M, Bounias I, Olsson M, et al. Glycaemic control and incidence of heart  
46 failure in 20 985 patients with type 1 diabetes: an observational study. *Lancet*. 2011.  
47
- 48  
49 22. Hoelzel W, Weykamp C, Jeppsson JO, et al. IFCC reference system for  
50 measurement of hemoglobin A1c in human blood and the national standardization schemes  
51 in the United States, Japan, and Sweden: a method-comparison study. *Clin Chem*.  
52  
53 2004;50:166-74.  
54  
55  
56  
57  
58  
59  
60

- 1  
2  
3 23. Levey AS, Bosch JP, Lewis JB, et al. A more accurate method to estimate  
4  
5 glomerular filtration rate from serum creatinine: a new prediction equation. Modification of  
6  
7 Diet in Renal Disease Study Group. *Ann Intern Med.* 1999;130:461-70.
- 8  
9 24. Lee BK, Lessler J, Stuart EA. Improving propensity score weighting using  
10  
11 machine learning. *Statistics in Medicine.* 2010;29:337-46.
- 12  
13 25. LIN DY, WEI LJ, YING Z. Checking the Cox model with cumulative sums of  
14  
15 martingale-based residuals. *Biometrika.* 1993;80:557-72.
- 16  
17 26. Collett D. *Modelling survival data in medical research.* 2 ed. Boca Raton: CRC  
18  
19 press; 2003.
- 20  
21 27. GRAMBSCH PM, THERNEAU TM. Proportional hazards tests and diagnostics  
22  
23 based on weighted residuals. *Biometrika.* 1994;81:515-26.
- 24  
25 28. Colayco DC, Niu F, McCombs JS, et al. A1C and cardiovascular outcomes in type  
26  
27 2 diabetes: a nested case-control study. *Diabetes Care.* 2011;34:77-83.
- 28  
29 29. Margolis DJ, Hoffstad O, Strom BL. Association between serious ischemic  
30  
31 cardiac outcomes and medications used to treat diabetes. *Pharmacoepidemiol Drug Saf.*  
32  
33 2008;17:753-9.
- 34  
35 30. Currie CJ, Peters JR, Tynan A, et al. Survival as a function of HbA(1c) in people  
36  
37 with type 2 diabetes: a retrospective cohort study. *Lancet.* 2010;375:481-9.
- 38  
39 31. Gamble JM, Simpson SH, Eurich DT, et al. Insulin use and increased risk of  
40  
41 mortality in type 2 diabetes: a cohort study. *Diabetes Obes Metab.* 2010;12:47-53.
- 42  
43 32. Mellbin LG, Malmberg K, Norhammar A, et al. The impact of glucose lowering  
44  
45 treatment on long-term prognosis in patients with type 2 diabetes and myocardial  
46  
47 infarction: a report from the DIGAMI 2 trial. *Eur Heart J.* 2008;29:166-76.
- 48  
49 33. Mellbin LG, Malmberg K, Norhammar A, et al. Prognostic implications of  
50  
51 glucose-lowering treatment in patients with acute myocardial infarction and diabetes:  
52  
53 experiences from an extended follow-up of the Diabetes Mellitus Insulin-Glucose Infusion in  
54  
55 Acute Myocardial Infarction (DIGAMI) 2 Study. *Diabetologia.* 2011;54:1308-17.
- 56  
57 34. Malmberg K, Ryden L, Wedel H, et al. Intense metabolic control by means of  
58  
59 insulin in patients with diabetes mellitus and acute myocardial infarction (DIGAMI 2): effects  
60  
61 on mortality and morbidity. *Eur Heart J.* 2005;26:650-61.
- 62  
63 35. Malmberg K, Ryden L, Efendic S, et al. Randomized trial of insulin-glucose  
64  
65 infusion followed by subcutaneous insulin treatment in diabetic patients with acute

1  
2  
3 myocardial infarction (DIGAMI study): effects on mortality at 1 year. J Am Coll Cardiol.  
4  
5 1995;26:57-65.  
6

7 36. Eeg-Olofsson K, Cederholm J, Nilsson PM, et al. New aspects of HbA1c as a risk  
8  
9 factor for cardiovascular diseases in type 2 diabetes: an observational study from the  
10  
11 Swedish National Diabetes Register (NDR). J Intern Med. 2010;268:471-82.  
12

13 37. Gerstein H, Yusuf S, Riddle MC, et al. Rationale, design, and baseline  
14  
15 characteristics for a large international trial of cardiovascular disease prevention in people  
16  
17 with dysglycemia: the ORIGIN Trial (Outcome Reduction with an Initial Glargine  
18  
19 Intervention). Am Heart J. 2008;155:26-32, e1-6.  
20

21 38. Chan NN, Brain HP, Feher MD. Metformin-associated lactic acidosis: a rare or  
22  
23 very rare clinical entity? Diabet Med. 1999;16:273-81.  
24  
25  
26  
27  
28  
29  
30  
31  
32  
33  
34  
35  
36  
37  
38  
39  
40  
41  
42  
43  
44  
45  
46  
47  
48  
49  
50  
51  
52  
53  
54  
55  
56  
57  
58  
59  
60

Table 1. Baseline characteristics in all 51,675 type 2 diabetes patients and in groups based on glucose-lowering treatments.

|                                    | Metformin Only | Metformin + other OHA | Metformin + insulin | Insulin only  | Other OHA only | Insulin + other OHA | Metformin + insulin + other OHA | Total          |
|------------------------------------|----------------|-----------------------|---------------------|---------------|----------------|---------------------|---------------------------------|----------------|
| N                                  | 14 697 (28 %)  | 8 807 (17 %)          | 7 109 (14 %)        | 12 291 (24 %) | 5 171 (10%)    | 1 365 (2.6 %)       | 2 235 (4.3 %)                   | 51 675 (100 %) |
| Age (Years)                        | 63.8 (9.7)     | 65.4 (9.7)            | 64.6 (8.8)          | 65.2 (10.5)   | 69.7 (9.5)     | 69.6 (9.1)          | 64.7 (8.5)                      | 65.3 (9.8)     |
| HbA1c (%)                          | 6.9 (3.1)      | 7.3 (3.2)             | 7.7 (3.4)           | 7.6 (3.4)     | 6.9 (3.0)      | 7.7 (3.3)           | 7.9 (3.4)                       | 7.3 (3.3)      |
| < 6.9                              | 8131 (55.3%)   | 3296 (37.4%)          | 1710 (24.1%)        | 3433 (27.9%)  | 2898 (56.0%)   | 326 (23.9%)         | 361 (16.2%)                     | 20155 (39.0%)  |
| 6.9 - 8.8                          | 6037 (41.1%)   | 4982 (56.6%)          | 4240 (59.6%)        | 7045 (57.3%)  | 2139 (41.4%)   | 845 (61.9%)         | 1478 (66.1%)                    | 26766 (51.8%)  |
| > 8.8                              | 529 (3.6%)     | 529 (6.0%)            | 1159 (16.3%)        | 1813 (14.8%)  | 134 (2.6%)     | 194 (14.2%)         | 396 (17.7%)                     | 4754 (9.2%)    |
| Systolic blood pressure (mmHg)     | 139.4 (16.6)   | 141.2 (16.9)          | 140.8 (16.8)        | 138.9 (18.0)  | 141.4 (17.5)   | 141.9 (18.2)        | 141.9 (16.4)                    | 140.1 (17.2)   |
| Diabetes duration (Years)          | 4.6 (4.3)      | 8.9 (5.9)             | 11.6 (7.0)          | 14.3 (10.4)   | 7.5 (6.2)      | 11.6 (6.8)          | 12.0 (6.2)                      | 9.4 (8.0)      |
| eGFR (mL/min/1.73 m <sup>2</sup> ) | 82.0 (20.2)    | 80.4 (21.1)           | 79.2 (21.5)         | 73.6 (23.8)   | 73.8 (21.1)    | 68.9 (22.4)         | 79.5 (21.2)                     | 78.1 (21.9)    |
| <45                                | 231 (1.6%)     | 222 (2.5%)            | 238 (3.3%)          | 1370 (11.1%)  | 404 (7.8%)     | 214 (15.7%)         | 63 (2.8%)                       | 2742 (5.3%)    |
| 45-60                              | 1572 (10.7%)   | 1167 (13.3%)          | 1024 (14.4%)        | 1955 (15.9%)  | 888 (17.2%)    | 255 (18.7%)         | 316 (14.1%)                     | 7177 (13.9%)   |
| >60                                | 12894 (87.7%)  | 7418 (84.2%)          | 5847 (82.2%)        | 8966 (72.9%)  | 3879 (75.0%)   | 896 (65.6%)         | 1856 (83.0%)                    | 41756 (80.8%)  |
| BMI (Kg/m <sup>2</sup> )           | 30.7 (4.9)     | 29.9 (4.9)            | 31.6 (5.0)          | 27.4 (4.8)    | 27.2 (4.5)     | 28.3 (4.9)          | 31.1 (5.1)                      | 29.5 (5.1)     |
| Non-HDL-C (mmol/L)                 | 3.64 (1.00)    | 3.53 (0.98)           | 3.39 (0.97)         | 3.35 (0.98)   | 3.60 (0.99)    | 3.52 (1.04)         | 3.39 (0.94)                     | 3.50 (0.99)    |
| Microalbuminuria                   | 21.0%          | 25.9%                 | 33.8%               | 30.8%         | 24.2%          | 34.4%               | 34.5%                           | 27.2%          |
| Previous hospitalisation           | 11.5%          | 11.6%                 | 18.1%               | 23.1%         | 15.5%          | 22.9%               | 15.2%                           | 16.1%          |
| Female sex                         | 44.7%          | 40.0%                 | 43.5%               | 40.2%         | 39.2%          | 39.8%               | 41.4%                           | 41.9%          |
| History of CVD                     | 15.9%          | 17.6%                 | 25.9%               | 26.4%         | 21.4%          | 30.2%               | 24.6%                           | 21.4%          |
| History of CHF                     | 3.5%           | 3.9%                  | 7.3%                | 8.9%          | 6.4%           | 10.1%               | 5.5%                            | 5.9%           |
| History of serious infections      | 1.8%           | 1.6%                  | 2.9%                | 4.9%          | 2.8%           | 5.2%                | 2.7%                            | 2.9%           |
| Cardiac glycosides                 | 2.6%           | 2.7%                  | 4.1%                | 3.0%          | 4.3%           | 6.2%                | 4.3%                            | 3.3%           |
| Organic nitrates                   | 6.3%           | 7.4%                  | 9.7%                | 8.5%          | 8.8%           | 13.0%               | 10.1%                           | 8.1%           |
| ASA                                | 45.4%          | 48.8%                 | 57.3%               | 45.7%         | 45.9%          | 55.4%               | 58.6%                           | 48.6%          |
| Lipid modifying agents             | 49.9%          | 54.0%                 | 61.7%               | 44.8%         | 44.1%          | 51.7%               | 63.6%                           | 51.1%          |
| Antihypertensive agents            | 71.8%          | 74.0%                 | 81.9%               | 66.2%         | 71.3%          | 79.5%               | 83.0%                           | 72.9%          |
| Multi-dose dispensation            | 1.4%           | 1.6%                  | 2.7%                | 3.0%          | 1.5%           | 3.7%                | 2.6%                            | 2.1%           |
| Smoker                             | 14.8%          | 14.0%                 | 12.8%               | 14.9%         | 12.3%          | 12.2%               | 13.6%                           | 14.0%          |

Means  $\pm$  one standard deviation (SD) and frequencies (%) are given. There were statistically significant differences ( $p < 0.001$ ) in all variables between the groups.



Table 2: Time of exposure (months) to specific glucose-lowering agents, and proportions changing treatment (%) in each group.

|                                  | Metformin Only | Metformin + other OHA | Metformin + insulin | Insulin only | Other OHA only | Insulin + other OHA | Metformin + insulin + other OHA |
|----------------------------------|----------------|-----------------------|---------------------|--------------|----------------|---------------------|---------------------------------|
| Mean Exposure time to metformin  | 49,4           | 51,0                  | 46,3                |              |                |                     | 48,9                            |
| Mean Exposure time to insulin    |                |                       | 51,8                | 55,3         |                | 54,1                | 53,4                            |
| Mean Exposure time to Other Oral |                | 49,1                  |                     |              | 45,3           | 39,5                | 48,3                            |
| Change treatment (%)             | 80.8 %         | 80.5 %                | 81.8 %              | 91.3 %       | 88.4 %         | 56.5 %              | 93.9 %                          |

Table 3. Adjusted hazard ratios (HR) with 95% confidence intervals (CI) for any CVD, fatal CVD, any acidosis/serious infection, fatal acidosis/serious infection, and all-cause mortality in all patients, in each treatment group, and with metformin only as reference

|                                  | Metformin only | Insulin only                    | Other OHA only                  | Insulin + other OHA             | Metformin + other OHA          | Metformin + insulin             | Metformin + Insulin + other OHA |
|----------------------------------|----------------|---------------------------------|---------------------------------|---------------------------------|--------------------------------|---------------------------------|---------------------------------|
| Any CVD                          | Reference      | 1.28 (1.19-1.37) <sup>***</sup> | 1.13 (1.04-1.23) <sup>**</sup>  | 1.40 (1.24-1.58) <sup>***</sup> | 1.11 (1.03-1.20) <sup>**</sup> | 1.28 (1.19-1.38) <sup>***</sup> | 1.33 (1.19-1.49) <sup>***</sup> |
| Fatal CVD                        | Reference      | 1.41 (1.18-1.68) <sup>***</sup> | 1.30 (1.08-1.56) <sup>**</sup>  | 1.17 (0.91-1.51)                | *                              | *                               | 1.21 (0.92-1.58)                |
| Acidosis/serious infection       | Reference      | 1.37 (1.26-1.50) <sup>***</sup> | 1.16 (1.04-1.28) <sup>**</sup>  | 1.31 (1.13-1.51) <sup>***</sup> | 1.04 (0.95-1.14)               | 1.20 (1.09-1.32) <sup>***</sup> | 1.15 (1.00-1.32)*               |
| Fatal acidosis/serious infection | Reference      | 1.63 (1.29-2.07) <sup>***</sup> | 1.28 (0.98-1.67)                | 1.32 (0.91-1.89)                | 0.94 (0.72-1.23)               | 1.41 (1.08-1.83) <sup>†</sup>   | 1.12 (0.73-1.67)                |
| All-cause mortality              | Reference      | 1.47 (1.35-1.61) <sup>***</sup> | 1.30 (1.18-1.44) <sup>***</sup> | 1.30 (1.12-1.50) <sup>***</sup> | 1.15 (1.05-1.27) <sup>**</sup> | 1.25 (1.13-1.38) <sup>***</sup> | 1.31 (1.14-1.52) <sup>***</sup> |

\* P<0.05

\*\* P<0.01

\*\*\* P<0.001

\*Non-proportional hazards, group excluded from analysis.

Table 4: Numbers and frequencies (%) of endpoint events in each treatment group.

|                                  | Metformin Only | Metformin + other OHA | Metformin + insulin | Insulin only | Other OHA only | Insulin + other OHA | Metformin+ insulin + other OHA |
|----------------------------------|----------------|-----------------------|---------------------|--------------|----------------|---------------------|--------------------------------|
| Any CVD                          | 1734 (3.3%)    | 1287 (4%)             | 1338 (5.4%)         | 2389 (5.9%)  | 929 (5.2%)     | 334 (7.8%)          | 415 (5.4%)                     |
| Fatal CVD                        | 264 (0.5%)     | 230 (0.6%)            | 276 (1%)            | 681 (1.4%)   | 237 (1.2%)     | 94 (1.8%)           | 74 (0.8%)                      |
| Acidosis/serious infection       | 1154 (2.1%)    | 843 (2.5%)            | 899 (3.4%)          | 1867 (4.3%)  | 623 (3.3%)     | 235 (5%)            | 259 (3.1%)                     |
| Fatal acidosis/serious infection | 127 (0.2%)     | 95 (0.3%)             | 124 (0.4%)          | 325 (0.7%)   | 109 (0.5%)     | 41 (0.8%)           | 29 (0.3%)                      |
| All-cause mortality              | 971 (1.7%)     | 834 (2.4%)            | 818 (2.9%)          | 2002 (4.2%)  | 745 (3.7%)     | 258 (4.9%)          | 250 (2.8%)                     |

Table 5. Adjusted hazard ratios with 95 % confidence intervals for any CVD, fatal CVD, any acidosis/serious infection, fatal acidosis/serious infection, and all-cause mortality in patients with insulin only and patients with metformin only as reference, or in patients with other OHA only and patients with metformin only as reference

|                                  | Events/Patients<br>N/N | Events/Patients<br>N/N | Hazard ratio<br>(95% CI)      | P-value |
|----------------------------------|------------------------|------------------------|-------------------------------|---------|
|                                  | <b>Insulin only</b>    | <b>Metformin only</b>  | <b>Insulin Vs metformin</b>   |         |
| Fatal/nonfatal CVD               | 2389 / 11427           | 1734 / 14317           | 1.18 (1.07-1.29)              | <0.001  |
| Fatal CVD                        | 681 / 12285            | 264 / 14696            | 1.12 (0.91-1.40)              | 0.29    |
| All-cause mortality              | 2002 / 12291           | 971 / 14697            | 1.34 (1.19-1.50)              | <0.001  |
| Acidosis/serious infection       | 1867 / 11860           | 1154 / 14517           | 1.28 (1.14-1.43)              | <0.001  |
| Fatal acidosis/serious infection | 325 / 12284            | 127 / 14697            | 1.45 (1.07-1.97)              | 0.019   |
|                                  | <b>Other OHA</b>       | <b>Metformin only</b>  | <b>Other OHA Vs metformin</b> |         |
| Fatal/nonfatal CVD               | 929 / 4964             | 1734 / 14317           | 1.02 (0.93-1.12)              | 0.71    |
| Fatal CVD                        | 237 / 5171             | 264 / 14696            | 1.03 (0.84-1.26)              | 0.80    |
| All-cause mortality              | 745 / 5171             | 971 / 14697            | 1.13 (1.01-1.27)              | 0.032   |
| Acidosis/serious infection       | 623 / 5062             | 1154 / 14517           | 1.05 (0.94-1.18)              | 0.41    |
| Fatal acidosis/serious infection | 109 / 5171             | 127 / 14697            | 1.13 (0.83-1.53)              | 0.44    |

Each comparison was adjusted by stratification with octiles of propensity scores.

Table 6. Adjusted hazard ratios (HR) with 95% confidence intervals for any CVD, any acidosis/serious infection, and all-cause mortality in subgroups of patients with different eGFR intervals. HR associated with the examined agent in any combination is given with any other glucose-lowering treatment as reference.

|                                       | 30 ≤ eGFR < 45 |                     |                   | 45 ≤ eGFR < 60 |                     |                    | eGFR ≥ 60      |                     |                     | All patients |        |
|---------------------------------------|----------------|---------------------|-------------------|----------------|---------------------|--------------------|----------------|---------------------|---------------------|--------------|--------|
|                                       | N (% of total) | Events (% of total) | HR (95 % CI)      | N (% of total) | Events (% of total) | HR (95 % CI)       | N (% of total) | Events (% of total) | HR (95 % CI)        | N            | Events |
| <b>Any CVD</b>                        |                |                     |                   |                |                     |                    |                |                     |                     |              |        |
| <b>Metformin</b>                      | 670 (35.4%)    | 210 (30.7%)         | 1.00 (0.83-1.19)  | 3839 (57.7%)   | 849 (51.2%)         | 0.94 (0.84-1.05)   | 27083 (67.3%)  | 3698 (63.4%)        | 0.98 (0.92-1.05)    | 31628        | 4774   |
| <b>Insulin</b>                        | 1180 (62.3%)   | 474 (69.2%)         | 1.30 (1.02-1.64)* | 3201 (48.1%)   | 930 (56.1%)         | 1.24 (1.09-1.42)** | 16718 (41.5%)  | 2853 (48.9%)        | 1.19 (1.11-1.27)*** | 21503        | 4476   |
| <b>Other OHA</b>                      | 702 (37.1%)    | 241 (35.2%)         | 1.03 (0.85-1.26)  | 2450 (36.8%)   | 608 (36.7%)         | 1.05 (0.93-1.18)   | 13552 (33.7%)  | 2065 (35.4%)        | 1.03 (0.97-1.09)    | 16817        | 2965   |
| <b>Total in group</b>                 | 1894           | 685                 |                   | 6655           | 1657                |                    | 40239          | 5829                |                     |              |        |
| <b>Any acidosis/serious infection</b> |                |                     |                   |                |                     |                    |                |                     |                     |              |        |
| <b>Metformin</b>                      | 1352 (66.1%)   | 361 (71.6%)         | 0.98 (0.79-1.21)  | 4000 (57.5%)   | 557 (49.4%)         | 0.85 (0.74-0.97)*  | 27618 (67.3%)  | 2444 (60.6%)        | 0.91 (0.84-0.98)*   | 32345        | 3155   |
| <b>Insulin</b>                        | 1302 (63.7%)   | 366 (72.6%)         | 1.34 (1.02-1.76)* | 3406 (48.9%)   | 652 (57.9%)         | 1.07 (0.91-1.26)   | 17152 (41.8%)  | 2057 (51%)          | 1.22 (1.12-1.32)*** | 22310        | 3260   |
| <b>Other OHA</b>                      | 738 (36.1%)    | 166 (32.9%)         | *                 | 2555 (36.7%)   | 379 (33.6%)         | 0.87 (0.75-1.00)   | 13852 (33.7%)  | 1375 (34.1%)        | 1.02 (0.95-1.09)    | 17265        | 1960   |
| <b>Total in group</b>                 | 2044           | 504                 |                   | 6960           | 1127                |                    | 41048          | 4034                |                     |              |        |
| <b>All-cause mortality</b>            |                |                     |                   |                |                     |                    |                |                     |                     |              |        |
| <b>Metformin</b>                      | 715 (33.3%)    | 179 (27%)           | 1.02 (0.84-1.24)  | 4079 (56.8%)   | 558 (46.5%)         | 0.87 (0.77-0.99)*  | 28015 (67.1%)  | 2120 (56.9%)        | 0.87 (0.81-0.94)*** | 32848        | 2873   |
| <b>Insulin</b>                        | 1386 (64.6%)   | 468 (70.5%)         | 1.16 (0.91-1.47)  | 3550 (49.5%)   | 701 (58.4%)         | 1.12 (0.95-1.31)   | 17565 (42.1%)  | 1921 (51.5%)        | 1.29 (1.19-1.41)*** | 23000        | 3328   |
| <b>Other OHA</b>                      | 766 (35.7%)    | 222 (33.4%)         | 0.97 (0.79-1.19)  | 2626 (36.6%)   | 429 (35.7%)         | 0.97 (0.84-1.11)   | 14049 (33.6%)  | 1375 (36.9%)        | 1.10 (1.02-1.19)†   | 17578        | 2087   |
| <b>Total in group</b>                 | 2146           | 664                 |                   | 7177           | 1201                |                    | 41756          | 3729                |                     |              |        |

\* P<0.05

\*\* P<0.01

\*\*\* P<0.001

\* Non-proportional hazards, group excluded from analysis.

Adjustments were made for age, sex, diabetes duration, HbA1c, non-HDL-C, BMI, smoking, eGFR, multi-dose dispensation, previous hospitalization, history of CVD and CHF, microalbuminuria, and treatment with antihypertensive agents, lipid lowering agents and cardiac glycosides.

Figure 1. Time (months) to event of all-cause mortality (a), any CVD (b), and any infection/acidosis (c) in each treatment group, unadjusted

a. All-cause mortality

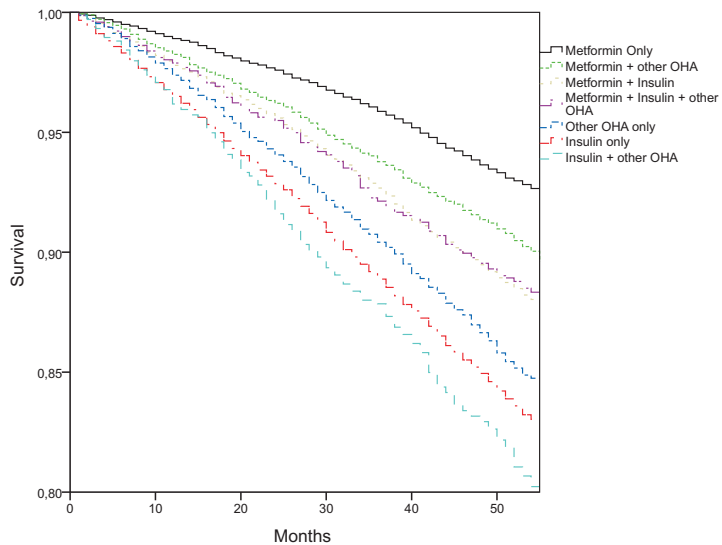

b. Any CVD

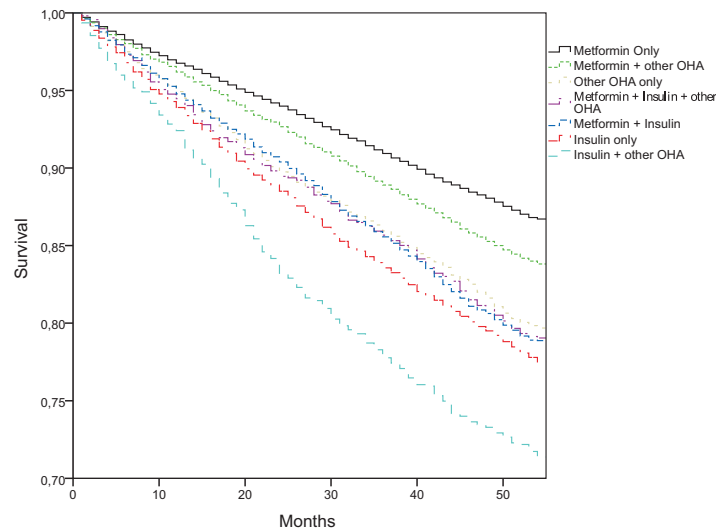

c. Any acidosis/infection

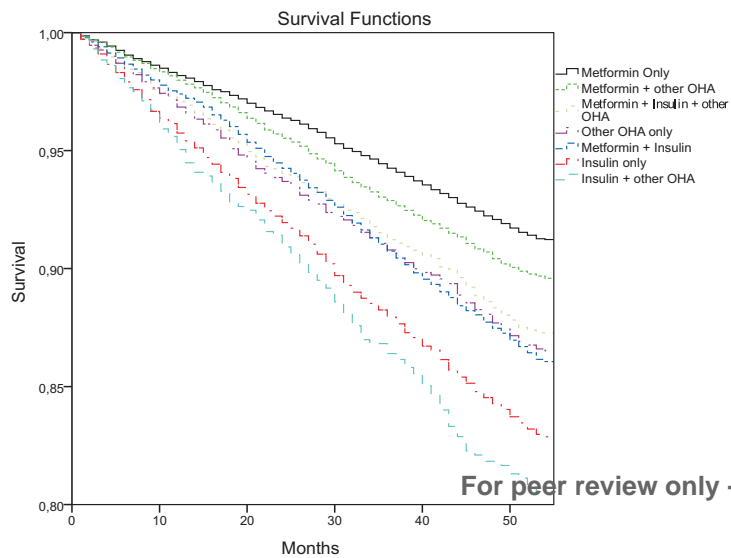

1  
2  
3  
4  
5  
6  
7  
8  
9  
10  
11  
12  
13  
14  
15  
16  
17  
18  
19  
20  
21  
22  
23  
24  
25  
26  
27  
28  
29  
30  
31  
32  
33  
34  
35  
36  
37  
38  
39  
40  
41  
42  
43  
44  
45  
46  
47

Appendix Figure 1. Enrollment of patients

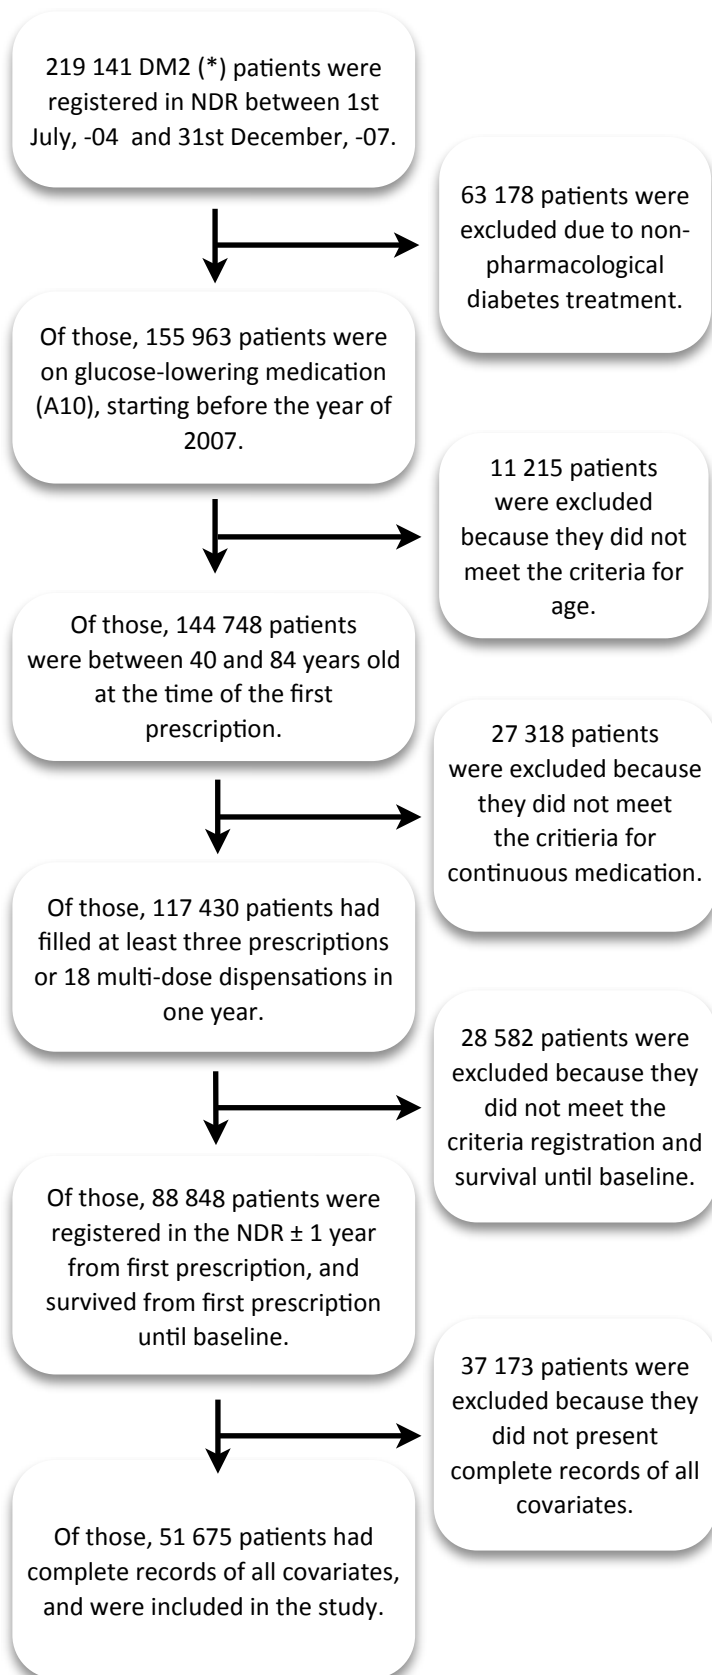

\* DM2 is Type 2 Diabetes Mellitus

Appendix Table 1. Baseline characteristics in groups of patients treated with metformin only, insulin only, or other OHA only, applied in Cox regression analyses presented in Table 5.

|                                    | Metformin Only | Insulin only | Other OHA only | P metformin only/<br>insulin only<br>Unadjusted | P metformin only/<br>insulin only<br>Adjusted for PS | P metformin only/<br>other OHA only<br>Unadjusted | P metformin only/<br>other OHA only<br>Adjusted for PS |
|------------------------------------|----------------|--------------|----------------|-------------------------------------------------|------------------------------------------------------|---------------------------------------------------|--------------------------------------------------------|
| N                                  | 14697          | 12291        | 5171           |                                                 |                                                      |                                                   |                                                        |
| Age (Years)                        | 63.8 (9.7)     | 65.2 (10.5)  | 69.7 (9.5)     | <0.001                                          | 0.49                                                 | <0.001                                            | 0.126                                                  |
| HbA1c (%)                          | 51.9 (10.4)    | 60.0 (13.6)  | 51.4 (9.5)     | <0.001                                          | 0.46                                                 | 0.002                                             | 0.24                                                   |
| Systolic blood pressure (mmHg)     | 139.4 (16.6)   | 138.9 (18.0) | 141.4 (17.5)   | 0.018                                           | 0.96                                                 | <0.001                                            | 0.164                                                  |
| Diabetes duration (Years)          | 4.6 (4.3)      | 14.3 (10.4)  | 7.5 (6.2)      | <0.001                                          | 0.78                                                 | <0.001                                            | 0.37                                                   |
| eGFR (mL/min/1.73 m <sup>2</sup> ) | 82.0 (20.2)    | 73.6 (23.8)  | 73.8 (21.1)    | <0.001                                          | 0.94                                                 | <0.001                                            | 0.177                                                  |
| BMI (Kg/m <sup>2</sup> )           | 30.7 (4.9)     | 27.4 (4.8)   | 27.2 (4.5)     | <0.001                                          | 0.53                                                 | <0.001                                            | 0.008                                                  |
| Non-HDL-C (mmol/L)                 | 3.64 (1.00)    | 3.35 (0.98)  | 3.60 (0.99)    | <0.001                                          | 0.78                                                 | 0.008                                             | 0.62                                                   |
| Microalbuminuria                   | 21.0%          | 30.8%        | 24.2%          | <0.001                                          | 0.46                                                 | <0.001                                            | 0.50                                                   |
| Previous hospitalisation           | 11.5%          | 23.1%        | 15.5%          | <0.001                                          | 0.57                                                 | <0.001                                            | 0.73                                                   |
| Female sex                         | 44.7%          | 40.2%        | 39.2%          | <0.001                                          | 0.73                                                 | <0.001                                            | 0.59                                                   |
| History of CVD                     | 15.9%          | 26.4%        | 21.4%          | <0.001                                          | 0.97                                                 | <0.001                                            | 0.111                                                  |
| History of CHF                     | 3.5%           | 8.9%         | 6.4%           | <0.001                                          | 0.022                                                | <0.001                                            | 0.74                                                   |
| History of serious infections      | 1.8%           | 4.9%         | 2.8%           | <0.001                                          | 0.96                                                 | <0.001                                            | 0.72                                                   |
| Cardiac glycosides                 | 2.6%           | 3.0%         | 4.3%           | 0.064                                           | 0.96                                                 | <0.001                                            | 0.196                                                  |
| Organic nitrates                   | 6.3%           | 8.5%         | 8.8%           | <0.001                                          | 0.61                                                 | <0.001                                            | 0.45                                                   |
| ASA                                | 45.4%          | 45.7%        | 45.9%          | 0.56                                            | 0.58                                                 | 0.52                                              | 0.65                                                   |
| Lipid modifying agents             | 49.9%          | 44.8%        | 44.1%          | <0.001                                          | 0.88                                                 | <0.001                                            | 0.94                                                   |
| Antihypertensive agents            | 71.8%          | 66.2%        | 71.3%          | <0.001                                          | 0.38                                                 | 0.58                                              | 0.81                                                   |
| Multi-dose dispensation            | 1.4%           | 3.0%         | 1.5%           | <0.001                                          | 0.97                                                 | 0.54                                              | 0.97                                                   |
| Smoker                             | 14.8%          | 14.9%        | 12.3%          | 0.77                                            | 0.104                                                | <0.001                                            | 0.28                                                   |

Means  $\pm$  standard deviation (SD) and proportions (%) of clinical variables at baseline. P values are given for comparison between metformin only and insulin only, and between metformin only and other OHA only, unadjusted and after adjustment by stratification for octiles of propensity scores applied for each comparison.



## Definitions of the endpoints (Appendix Text)

### Cardiovascular disease (CVD)

CVD was defined as diagnosis of myocardial infarction (ICD-10 code I21), angina pectoris (ICD-10 code I20.0), intracerebral haemorrhage, cerebral infarction, unspecified stroke (ICD-10 codes I61, I63, I64 and I679), peripheral vascular disease (PVD, ICD-10 codes E105, E115, E145, I702, I731, I739 and I792), or intervention with percutaneous coronary intervention (PCI) or coronary artery bypass grafting (CABG), whichever occurred first.

### Acidosis/serious infection

Acidosis/infection was defined as diagnosis of acidosis or chock (ICD-10 codes E10.1, E10.1A, E10.1D, E10.1X, E11.1, E11.1A, E11.1D, E11.1X, E13.1, E14.1, E87.2, R57.1, R57.2, R57.8 or R57.9, or diagnosis of serious infection (ICD-10 codes A00-A09, A15-A19, A32.7, A39-A41, A42.7, A48, B37.7, I00-I02, I33, I38, I39, J13-J18, J85, J86, K25, K61, K80.0, K80.3, K80.4, K81, K83.0, K85, K86, M00, M46.2, M72.6, M86.0, M86.1, M86.8 or M86.9 or acute renal failure (ICD-10 codes N10.9 or N17).

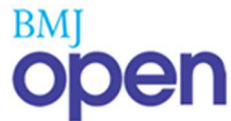

**Effectiveness and safety of metformin in 51 675 patients with type 2 diabetes and different levels of renal function: A cohort study from the Swedish National Diabetes Register**

|                                 |                                                                                                                                                                                                                                                                                                                                                                                                                                                                                                                                                                                                                                                                                                                                                                                                                                                             |
|---------------------------------|-------------------------------------------------------------------------------------------------------------------------------------------------------------------------------------------------------------------------------------------------------------------------------------------------------------------------------------------------------------------------------------------------------------------------------------------------------------------------------------------------------------------------------------------------------------------------------------------------------------------------------------------------------------------------------------------------------------------------------------------------------------------------------------------------------------------------------------------------------------|
| Journal:                        | <i>BMJ Open</i>                                                                                                                                                                                                                                                                                                                                                                                                                                                                                                                                                                                                                                                                                                                                                                                                                                             |
| Manuscript ID:                  | bmjopen-2012-001076.R1                                                                                                                                                                                                                                                                                                                                                                                                                                                                                                                                                                                                                                                                                                                                                                                                                                      |
| Article Type:                   | Research                                                                                                                                                                                                                                                                                                                                                                                                                                                                                                                                                                                                                                                                                                                                                                                                                                                    |
| Date Submitted by the Author:   | 01-May-2012                                                                                                                                                                                                                                                                                                                                                                                                                                                                                                                                                                                                                                                                                                                                                                                                                                                 |
| Complete List of Authors:       | Ekström, Nils; University of Gothenburg, Department of Medicine<br>Schiöler, Linus; Center of Registers in Region Västra Götaland, ; University of Gothenburg, Department of Public Health and Community Medicine<br>Svensson, Ann-Marie; Center of Registers in Region Västra Götaland,<br>Eeg-Olofsson, Katarina; University of Gothenburg, Department of Medicine<br>Miao Jonasson, Junmei; Center of Registers in Region Västra Götaland,<br>Zethelius, Bjorn.; Uppsala University, Public Health/Geriatrics<br>Cederholm, Jan; Uppsala University, Department of Public Health and<br>Caring Sciences / Family Medicine and Clinical Epidemiology<br>Eliasson, Björn; University of Gothenburg, Department of Medicine<br>Gudbjörnsdottir, Soffia; University of Gothenburg, Department of Medicine;<br>Center of Registers in Region Västra Götaland, |
| <b>Primary Subject Heading</b>: | Diabetes and endocrinology                                                                                                                                                                                                                                                                                                                                                                                                                                                                                                                                                                                                                                                                                                                                                                                                                                  |
| Secondary Subject Heading:      | Epidemiology, Pharmacology and therapeutics, Cardiovascular medicine                                                                                                                                                                                                                                                                                                                                                                                                                                                                                                                                                                                                                                                                                                                                                                                        |
| Keywords:                       | Diabetes & endocrinology < INTERNAL MEDICINE, EPIDEMIOLOGY, THERAPEUTICS, Vascular medicine < INTERNAL MEDICINE, Adverse events < THERAPEUTICS                                                                                                                                                                                                                                                                                                                                                                                                                                                                                                                                                                                                                                                                                                              |
|                                 |                                                                                                                                                                                                                                                                                                                                                                                                                                                                                                                                                                                                                                                                                                                                                                                                                                                             |

SCHOLARONE™  
Manuscripts

1  
2  
3 Effectiveness and safety of metformin ~~and other glucose-lowering treatments~~  
4  
5 in 51 675 patients with type 2 diabetes ~~and different levels of renal function:~~  
6  
7 A cohort study from the Swedish National Diabetes Register ~~(NDR)~~  
8  
9

10  
11 Authors

12 Nils Ekström<sup>1</sup>, Linus Schiöler<sup>1,2</sup>, Ann-Marie Svensson<sup>1</sup>, Katarina Eeg-Olofsson<sup>3</sup>, Junmei  
13 Miao Jonasson<sup>1</sup>, Björn Zethelius<sup>4</sup>, Jan Cederholm<sup>5</sup>, Björn Eliasson<sup>3</sup>, Soffia Gudbjörnsdottir  
14  
15  
16  
17  
18  
19  
20  
21  
22  
23  
24  
25  
26  
27  
28  
29  
30  
31  
32  
33  
34  
35  
36  
37  
38  
39  
40  
41  
42  
43  
44  
45  
46  
47  
48  
49  
50  
51  
52  
53  
54  
55  
56  
57  
58  
59  
60

Affiliations

1 Centre of Registers in Region Västra Götaland, Gothenburg, Sweden

2 Department of Public Health and Community Medicine, Sahlgrenska Academy, University  
of Gothenburg, Sweden

3 Department of Medicine, Sahlgrenska Academy, University of Gothenburg, Sweden

4 Department of Public Health and Caring Sciences / Geriatrics, Uppsala University and  
Medical Products Agency, Uppsala, Sweden

5 Department of Public Health and Caring Sciences / Family Medicine and Clinical  
Epidemiology, Uppsala University, Sweden

Authors' addresses

Nils Ekström, Department of Medicine, Sahlgrenska University Hospital, University of  
Gothenburg, 413 45 Göteborg, Sweden. Linus Schiöler (PhD), Department of Public Health  
and Community Medicine, Sahlgrenska Academy, University of Gothenburg, Box 414, 405 30  
Göteborg, Sweden. Ann-Marie Svensson (RN, PhD), National Diabetes Register,  
Registercentrum VGR, 413 45 Göteborg, Sweden. Katarina Eeg-Olofsson (MD, PhD),  
Department of Medicine, Sahlgrenska University Hospital, University of Gothenburg, 413 45  
Göteborg, Sweden. Junmei Miao Jonasson (MD, PhD), National Diabetes Register,  
Registercentrum VGR, 413 45 Göteborg, Sweden. Björn Zethelius (MD, PhD, Assoc. prof.),  
Geriatrics Section, Department of Public Health and Caring Sciences, Uppsala University, Box  
564, 751 22 Uppsala, Sweden. Jan Cederholm (MD, PhD, Assoc. prof.), Family Medicine and  
Clinical Epidemiology Section, Department of Public Health and Caring Sciences, Uppsala  
University, BMC, Box 564, 751 22 Uppsala, Sweden. Björn Eliasson (MD, PhD, Prof),

1  
2  
3 Department of Medicine, Sahlgrenska University Hospital, University of Gothenburg, 413 45  
4 Göteborg, Sweden. Soffia Gudbjörnsdottir (MD, PhD, Assoc. prof.), Department of Medicine,  
5 Sahlgrenska University Hospital, University of Gothenburg, 413 45 Göteborg, Sweden.  
6  
7  
8  
9

10  
11  
12 Corresponding author

13 Nils Ekström

14 Phone: +46 (0)70 2890121

15 E-mail: nils.ekstrom@gu.se  
16  
17  
18  
19  
20  
21  
22

|               |          |      |
|---------------|----------|------|
| 23 Word count | Abstract | 292  |
|               | Body     | 3773 |

24  
25  
26  
27  
28  
29  
30  
31  
32  
33  
34  
35  
36  
37  
38  
39  
40  
41  
42  
43  
44  
45  
46  
47  
48  
49  
50  
51  
52  
53  
54  
55  
56  
57  
58  
59  
60

## Abstract

**Objective:** To evaluate the ~~risks of cardiovascular disease (CVD), lactic acidosis, serious infections and mortality~~ effectiveness and safety of metformin use in clinical practice in a large sample of pharmacologically treated patients with type 2 diabetes ~~in clinical practice, with particular emphasis on metformin~~ and different levels of renal function.

**Design:** Observational study between July 2004 and December 2010, ~~mean follow-up 3.9 years.~~

**Setting:** Hospital outpatient clinics and primary care in Sweden.

**Participants:** 51675 men and women with type 2 diabetes, registered in the Swedish National Diabetes Register, and on continuous glucose-lowering treatment with oral hypoglycemic agents (OHA) or insulin.

**Main outcome measures:** Risks of cardiovascular disease (CVD), all-cause mortality, acidosis/serious infection, associated with each treatment regimens, were analysed in all patients and in subgroups with different estimated glomerular filtration rate (eGFR) intervals. Covariance adjustment and propensity scores were used to adjust for several baseline risk factors and characteristics at Cox regression.

**Results:** ~~Insulin in monotherapy showed an increased risk of fatal/non-fatal CVD and all-cause mortality compared to metformin in monotherapy, hazard ratio (HR) 1.18 (95% confidence interval: 1.07 to 1.29) and 1.34 (1.19 to 1.50), respectively. Metformin showed a reduced risk of any acidosis/serious infection, HR 0.85 (0.74 to 0.97), and all-cause mortality, 0.87 (0.77 to 0.99) in patients with eGFR 45-60 mL/min/1.73 m<sup>2</sup>, and was not associated with increased risk of all-cause mortality, acidosis/serious infection or CVD in patients with renal impairment.~~

~~Compared to metformin in monotherapy, hazard ratios (HR) for fatal/nonfatal CVD and all-cause mortality with all other OHAs combined (approximately 80% sulphonylureas) in monotherapy were 1.02 (95% confidence interval 0.93-1.12) and 1.13 (1.01-1.27), while 1.18 (1.07-1.29) and 1.34 (1.19-1.50) with insulin in monotherapy, adjusting using propensity scores.~~

~~Metformin, compared to any other treatment, showed reduced risks of acidosis/serious infection, adjusted HR 0.85 (0.74-0.97), and all-cause mortality, HR 0.87 (0.77-0.99), in patients with eGFR 45-60 mL/min/1.73 m<sup>2</sup>, and no increased risks of all-cause mortality,~~

1  
2  
3 acidosis/serious infection or CVD were found in patients with eGFR 30-45 mL/min/1.73 m<sup>2</sup>.  
4

5 **Conclusions:** Metformin-based therapies were associated with reduced risks of severe  
6 endpoints, also after different adjustments for patient characteristics. Results were  
7 consistent in patients with renal impairment, and no increased risk of acidosis/serious  
8 infection was seen. showed lower risk than insulin for CVD and all-cause mortality, and  
9 slightly lower risk for all-cause mortality compared to other OHA, in these 51675 patients  
10 followed for 4 years. Patients with renal impairment showed no increased risk of CVD, all-  
11 cause mortality or acidosis/serious infection. In clinical practice, the benefits of metformin  
12 use clearly outbalance the risk of severe side effects.  
13  
14  
15  
16  
17  
18  
19  
20  
21  
22  
23  
24  
25  
26  
27  
28  
29  
30  
31  
32  
33  
34  
35  
36  
37  
38  
39  
40  
41  
42  
43  
44  
45  
46  
47  
48  
49  
50  
51  
52  
53  
54  
55  
56  
57  
58  
59  
60

## Introduction

Type 2 diabetes mellitus (DM2) is a common disease, which causes major morbidity and mortality due to micro- and macrovascular complications (1). A range of glucose-lowering agents with different properties aims at preventing these complications. The UK Prospective Diabetes Study (UKPDS) demonstrated a reduced risk of all-cause mortality in the subgroup of obese DM2 patients treated with metformin compared to sulfonylureas, insulin or diet alone (2, 3). Further beneficial effects with metformin have been recognized (4, 5). Thus, international treatment guidelines recommend metformin as first line pharmacological treatment in DM2 patients primarily based on the results from the UKPDS sub-study including 342 patients on metformin (6-9).

Metformin have been considered causing increased risk of lactic acidosis. Consequently, metformin treatment have been contraindicated in patients at risk of developing lactic acidosis, e.g. patients with cardiovascular and renal disease (10). Given the high prevalence of micro- and macrovascular disease in the DM2 population (11), a relatively large proportion was comprehended by the contraindications. However, several studies have suggested this concern to be exaggerated (12-14).

In the light of these findings, most guidelines have become less strict towards metformin treatment in these patients (6, 8). However, there is still a great need for clinical and epidemiological studies investigating the overall effects of metformin in patients considered vulnerable to such treatment. Therefore, the aim of this survey was to investigate benefits and risks associated with different glucose-lowering medications, in a cohort of 51 675 DM2 patients in clinical practice, and in subgroups of patients with different degrees of renal impairment.

## Material and Methods

In this population-based, longitudinal study information was linked from four national registers in Sweden; the national diabetes register (NDR), the prescribed drug register (15), the patient register, and the cause of death register (16, 17). NDR is based and administered in Göteborg, Sweden. Since the establishment in 1996, NDR has been working with

1  
2  
3 systematic quality improvement, research and development in the field of Diabetes Mellitus.  
4  
5 In 2009, NDR covered 262 333 patients with type 1 diabetes mellitus (DM1) and DM2 (18-  
6  
7 21). Physicians and nurses in hospital outpatient clinics and primary health care clinics report  
8  
9 to the NDR at least annually, via the Internet or via direct transfer of data from medical  
10  
11 records databases. All included patients have agreed to be registered before inclusion.  
12

### 13 14 15 Study population

16 This study, approved by the central ethical review board at the University of Gothenburg,  
17  
18 comprises 51 675 DM2 patients. All pharmacologically treated DM2 patients aged  $\geq 40$  to  
19  
20  $< 85$  years, and registered in the NDR between July 1, 2004 and December 31, 2007 were  
21  
22 eligible for inclusion in the study (Appendix Figure 1). DM2 was defined as treatment with  
23  
24 diet only, or oral hypoglycemic agents (OHA) only, or onset age of diabetes  $\geq 40$  years and  
25  
26 treatment with insulin only or combined with OHA. Patients had to be registered in the NDR  
27  
28 one year prior to and one year following their first prescription of glucose-lowering  
29  
30 treatment. In order to achieve adequate length of the follow up period, they had to be  
31  
32 initiated on glucose-lowering treatment before 2007 to be included.  
33

34  
35 ~~Baseline occurred twelve months after the first prescription of glucose-lowering medication.~~  
36  
37 In each patient, baseline was defined as occurring after 12 months of continuous use of the  
38  
39 prescribed glucose-lowering medication. Only patients who had filled at least three  
40  
41 prescriptions or 18 fills of multi-dose dispensed drugs during this twelve months period were  
42  
43 included in the study. Patients who had collected both ordinary prescriptions and multi-dose  
44  
45 dispensed drugs were excluded. Thus, twelve months of continuous glucose-lowering  
46  
47 medication at baseline was ensured. The patients were classified according to glucose-  
48  
49 lowering treatment, and clinical characteristics were analysed at baseline. All patients with  
50  
51 data available for the analysed variables were included. Other OHA consisted of patients  
52  
53 treated with all OHAs other than metformin. The majority of this group (approximately 80%)  
54  
55 was treated with sulphonylureas (SU).  
56

### 57 58 Baseline

59 Variables assessed at baseline are presented in Table 1. History of congestive heart failure  
60  
(CHF), and CVD were defined as at least one event of CHF or CVD respectively, anytime



1  
2  
3 between the year of 1987 and the start of the study. History of serious infections was  
4 defined as at least one severe infection within six months prior to baseline, and the variable  
5 previous hospitalization as hospitalization for at least three consecutive days within six  
6 months prior to baseline.  
7  
8  
9

10  
11  
12 The patients were screened using methods applied at each local centre, but guidelines were  
13 available to ensure the use of similar methodology at all centres. Body mass index (BMI) was  
14 calculated as weight in kilograms divided by height in meters squared. A smoker was a  
15 patient smoking one or more cigarettes per day, or a pipe daily, or who had stopped  
16 smoking within the past three months. Cumulative microalbuminuria was defined as urine  
17 albumin excretion  $>20 \mu\text{g}/\text{min}$  in two out of three consecutive tests. Laboratory analyses,  
18 including total cholesterol (TC) and HDL-Cholesterol (HDL-C) were carried out at local  
19 laboratories. HbA1c analyses are quality assured in Sweden by regular calibration with  
20 Mono-S, a HPLC method. HbA1c values were converted to the National Glycohemoglobin  
21 Standardization Program (NGSP) standard levels (22). Non-HDL-cholesterol (non-HDL-C) was  
22 calculated by subtracting HDL-C from TC. Estimated glomerular filtration rate (eGFR) was  
23 calculated using the MDRD (Modification of Diet in Renal Disease) equation (23).  
24  
25  
26  
27  
28  
29  
30  
31  
32  
33  
34  
35

### 36 Follow up

37  
38 All patients were followed from baseline until the occurrence of an endpoint event, or  
39 otherwise, until censor date of December 31, 2010. Patients who experienced an endpoint  
40 event between first prescription and baseline were excluded from the analysis of that  
41 specific endpoint. Patients changing treatment during the study were not censored, and  
42 endpoint events were attributed the initial treatment. Mean follow up was 3.9 years. The  
43 five endpoints analysed were any CVD, fatal CVD, any acidosis/serious infection, fatal  
44 acidosis/serious infection and all-cause mortality. CVD was defined as diagnosis of  
45 myocardial infarction, angina pectoris, intracerebral haemorrhage, cerebral infarction,  
46 unspecified stroke, peripheral vascular disease (PVD), or intervention with percutaneous  
47 coronary intervention (PCI) or coronary artery bypass grafting (CABG), whichever occurred  
48 first. Acidosis/serious infection was defined as diagnosis of acidosis, serious infection, shock,  
49 or acute renal failure, which are frequently associated with lactic acidosis. Serious infections  
50 requiring hospitalization for anti-infectious treatment as well as acidosis, shock, and acute  
51  
52  
53  
54  
55  
56  
57  
58  
59  
60

1  
2  
3 renal failure requiring treatment in hospital, usually intensive care thus, registered in the  
4 inpatient register, were included in the composite endpoint. The international classifications  
5 of diseases-10 codes for all endpoints are given in Appendix Materials. Fatality was defined  
6 as an event followed by death in the subsequent 28 days.  
7  
8  
9

## 10 11 12 Statistical Methods

13 Baseline characteristics were compared, unadjusted, using ANOVA and logistic regression  
14 (Table 1). Propensity scores were estimated using boosted CART (24), since logistic  
15 regression did not achieve good balance. Baseline characteristics were then compared using  
16 logistic regression or OLS regression, adjusted for octiles of the propensity score (Appendix  
17 Table 1). Unadjusted survival of the endpoints by treatment groups in all patients was  
18 estimated with the Kaplan-Meier estimator (Figure 1).  
19  
20  
21  
22  
23  
24  
25  
26  
27

28 Cox regression models were used to estimate hazard ratios (HR) for all endpoints in groups  
29 of patients with different glucose-lowering treatments, and metformin only as reference.  
30 Adjustments were made for age, sex, diabetes duration, HbA1c, non-HDL-C, BMI, smoking,  
31 eGFR, multi-dose dispensation, previous hospitalization, history of CVD and CHF,  
32 microalbuminuria, and treatment with antihypertensive agents, lipid-lowering agents and  
33 cardiac glycosides (Table 2). HR were also estimated in patients with insulin only or other  
34 OHA only compared to metformin only, adjusted by stratification for octiles of propensity  
35 scores as described above (Table 3). HR were estimated in subgroups with different eGFR  
36 intervals (Table 4), for metformin, insulin or other OHA, with any other glucose-lowering  
37 treatment as reference. Adjustment was made for same covariates as in Table 2.  
38  
39  
40  
41  
42  
43  
44  
45  
46  
47  
48

49 Functional form of continuous covariates were checked using a Kolmogorov-type supremum  
50 test (25) and in some models it was found suitable to add a quadratic term for age or  
51 diabetes duration. The proportional hazards (PH) assumption was checked by including the  
52 interaction between covariates and log of follow up time. Violations of the PH assumption  
53 were handled by stratifying on the violating covariate, or by modelling the effect as time  
54 dependent (26). Additional checks of the form of the time dependence were made using  
55 plots of scaled Schoenfeld residuals (27).  
56  
57  
58  
59  
60

1  
2  
3 All statistical analyses were performed with SAS version 9.2 (SAS Institute, Cary, NC, USA),  
4 except Kaplan-Meier curves produced in SPSS version 18 (SPSS Inc., Chicago, USA), and  
5 propensity scores estimated using the package TWANG in R (R Foundation for Statistical  
6 Computing, Vienna, Austria). A two-sided P-value < 0.05 was considered statistically  
7 significant.  
8  
9  
10  
11  
12

### 13 14 15 Role of the funding source

16 The Region Västra Götaland and the Swedish Association of Local Authorities and Regions  
17 fund the NDR. LS, AMS, JMJ, and SG were also supported by an unrestricted research grant  
18 from BMS, France. The funders had no role in study design, data collection and analysis,  
19 decision to publish, or preparation of the manuscript.  
20  
21  
22  
23  
24  
25

## 26 Results

### 27 Patients

28  
29 Table 1 gives the distribution between treatments and clinical characteristics at baseline,  
30 unadjusted. The total population presented a mean ( $\pm$ SD) age of  $65.3\pm 9.8$  years with mean  
31 diabetes duration of  $9.4\pm 8.0$  years, and a mean HbA1c of  $7.3\pm 3.3$  %. The proportion of  
32 females were 41.9 % and 14.0 % of the population were smokers. Mean BMI was  $29.5\pm 5.1$   
33  $\text{kg/m}^2$ , mean systolic blood pressure 140 mmHg, mean Non-HDL 3.5 mmol/L, and mean  
34 eGFR  $78.1\pm 21.9$  mL/min/1.73  $\text{m}^2$ . 21.4 % had history of CVD, 5.9 % history of CHF, and 2.9 %  
35 history of serious infections. There were statistically significant differences between the  
36 groups defined for all variables. Patients on insulin-based treatments presented longer  
37 diabetes duration, higher mean HbA1c, more often microalbuminuria and history of CVD,  
38 CHF and serious infections than the population in general.  
39  
40  
41  
42  
43  
44  
45  
46  
47  
48  
49

50 Patients treated with metformin generally presented high eGFR and BMI. Patients on  
51 metformin in monotherapy were the youngest participants, with the shortest diabetes  
52 duration, and had a low mean HbA1c. They also relatively seldom had history of CVD, CHF or  
53 serious infections. Patients treated with other OHA in monotherapy presented the highest  
54 mean age, the lowest mean HbA1c and the lowest mean BMI. After adjustment with  
55 propensity score, all differences in baseline characteristics except for history of CHF, and  
56 BMI were erased (Appendix Table 1). CHF and BMI were further adjusted for with  
57  
58  
59  
60

1  
2  
3 stratification and as a covariate, respectively. Median daily doses of metformin were  
4 approximately 1100 mg in the metformin monotherapy group, 1700 mg in metformin +  
5 other OHA, 1700 mg in metformin + insulin and 1900 mg in metformin + insulin + other OHA.  
6  
7  
8  
9

10 Appendix Table 2 gives time of exposure to the glucose-lowering agents and proportions of  
11 patients changing treatment, in each group. The proportions changing treatment ranged  
12 between 56.5 % and 93.9 %. Comparison of baseline characteristics in patients who changed  
13 treatment and patients who did not change treatment, showed significant differences, with  
14 e.g. more frequent history of CVD, CHF and serious infections in patients who did not change  
15 treatment, ( $P < 0.05$ ).  
16  
17  
18  
19  
20  
21  
22

### 23 Outcomes

24 Figure 1 shows unadjusted time to an event of all-cause mortality, any CVD, and any  
25 acidosis/serious infection in each treatment group. The steepest decreases of curves were  
26 seen with insulin only and insulin in combination with other OHA. Table 2 gives HR with 95 %  
27 confidence intervals (CI) for all endpoints, adjusted for covariates as given in the Table. All  
28 treatments were associated with significantly increased risks of all-cause mortality and any  
29 CVD compared to metformin only, with HR ranging from 1.47 (95 % CI: 1.35 to 1.61) to 1.15  
30 (1.05 to 1.27) for all-cause mortality and from 1.40 (1.24 to 1.58) to 1.11 (1.03 to 1.20) for  
31 any CVD. Insulin only and other OHA only also showed a significantly increased risk of fatal  
32 CVD. All treatments except metformin in combination with other OHA were associated with  
33 a significantly increased risk of any acidosis/serious infection, and insulin only or in  
34 combination with metformin showed an increased risk of fatal acidosis/serious infection.  
35 Relatively few fatal events occurred during follow-up (Appendix Table 3), contributing to the  
36 wider confidence intervals for these risk estimates. Similar results were seen when using  
37 other OHA only as reference group instead of metformin only (Appendix Table 4). This  
38 analysis also showed significantly increased risks of all endpoints except fatal CVD associated  
39 with insulin only compared to other OHA only. Furthermore, insulin only or in combination  
40 with other glucose-lowering agents was constantly associated with increased risk of any CVD  
41 compared to other OHA only.  
42  
43  
44  
45  
46  
47  
48  
49  
50  
51  
52  
53  
54  
55  
56  
57  
58  
59  
60

1  
2  
3 Table 3 gives HR with 95 % CI for all endpoints with insulin only or other OHA only compared  
4 to metformin only, adjusted for propensity score. Insulin was associated with significantly  
5 increased risks of any CVD, HR 1.18 (1.07 to 1.29), all-cause mortality, HR 1.34 (1.19 to 1.50),  
6 and also any acidosis/serious infection and fatal acidosis/serious infection, HR 1.28 (1.14 to  
7 1.43) and 1.45 (1.07 to 1.97). When comparing other OHA only to metformin only, a  
8 borderline significantly increased risk was seen for all-cause mortality, HR 1.13 (1.01 to  
9 1.27). The results were identical when analysing SU only instead of other OHA only, and  
10 metformin only as reference, with significant HR for all-cause mortality. As shown in  
11 Appendix Table 5: HR was 0.99 (0.89-1.09) for any CVD, 1.01 (0.82-1.25) for fatal CVD, 1.15  
12 (1.02-1.30) for all-cause mortality, 1.00 (0.89-1.14) for any acidosis/serious infection, 1.17  
13 (0.85-1.60) for fatal acidosis/serious infection.

14  
15  
16  
17  
18  
19  
20  
21  
22  
23  
24  
25  
26 As shown in Appendix Table 6, insulin in combination with metformin was associated with a  
27 reduced risk for all-cause mortality, HR 0.84 (0.76-0.91) and any acidosis/serious infection,  
28 HR 0.86 (0.79-0.94) when compared to insulin only. No reduced risk for CVD was seen.  
29 Insulin in combination with other OHA was not associated with reduced risk for any of the  
30 endpoints compared to insulin only.

31  
32  
33  
34  
35  
36  
37 Table 4 gives HR with 95 % CI for any CVD, any acidosis/serious infection and all-cause  
38 mortality, in subgroups of patients with different eGFR intervals, adjusted for covariates as  
39 given in the Table. Treatments with metformin, insulin, or other OHA in any combination  
40 were compared to any other treatment. Metformin-based treatments were associated with  
41 reduced risks of any acidosis/serious infection HR 0.85 (0.74 to 0.97) and all-cause mortality  
42 HR 0.87 (0.77 to 0.99) in the subgroup of patients with eGFR 45-60 mL/min/1.73 m<sup>2</sup>. Similar  
43 results were seen in the subgroup with eGFR >60 mL/min/1.73 m<sup>2</sup>, HR 0.91 (0.84 to 0.98) for  
44 any acidosis/serious infection and 0.87 (0.81 to 0.94) for all-cause mortality. Both insulin and  
45 other OHA were associated with increased risk of all-cause mortality in patients with eGFR  
46 >60 mL/min/1.73 m<sup>2</sup>. Insulin was also associated with increased risk of any acidosis/serious  
47 infection in patients with eGFR 30-45, or >60 mL/min/1.73 m<sup>2</sup>, and increased risk of any CVD  
48 in patients with eGFR 30-45, 45-60, or >60 mL/min/1.73 m<sup>2</sup>.

## Discussion

This population-based observational study demonstrates beneficial effects of metformin in clinical practice. As expected, there were significant differences in clinical characteristics between the groups. These differences, however, disappeared after adjustment with propensity scores. Still, metformin in monotherapy showed a significantly reduced risk of any CVD, all-cause mortality, any acidosis/serious infection and fatal acidosis/serious infection compared to insulin in monotherapy. A borderline significant risk reduction of all-cause mortality was also shown compared to other OHA in monotherapy. Furthermore, there was no increased risk of severe outcomes in patients with impaired renal function.

~~The increased risk associated with insulin treatment could be due to these patients presenting a more severe disease. However, an increased risk caused by insulin *per se* cannot be ruled out. Others have reported similar effects associated with insulin treatment (28-33), but the literature is not consistent in this matter (34-36). Results from a large clinical trial investigating the effects of insulin treatment on CVD (37) are expected to be presented in the near future, and will hopefully bring clarity in this matter.~~

The beneficial effects of metformin, shown in this survey, are generally consistent with previous findings. The UKPDS demonstrated a reduction in all-cause mortality in the subgroup of obese DM2 patients treated with metformin compared to diet, SU or insulin (2), also confirmed in a 10-year post-interventional follow-up (3). ~~Another clinical trial indicated reduced risk of macrovascular events in insulin-treated DM2 patients when adding metformin compared to placebo (4).~~ Furthermore, several recent observational studies have reported reduced risk with metformin compared to all other hypoglycaemic agents for coronary heart disease (CHD) (29, 32), and for total mortality in patients with previous CHD (14), as also seen in this study for total mortality in patients with normal or slightly reduced renal function. In the present study, a reduced risk of total mortality was also found when comparing insulin in combination with metformin to insulin only, although not verifying a finding of reduced risk of macrovascular events in a small clinical trial comparing the addition of metformin to placebo in insulin treated DM2 patients (4).

Interestingly, we found somewhat reduced risk for total mortality, but not for CVD, with

1  
2  
3 metformin only compared to SU only or other OHA only. These findings were also clearly  
4 demonstrated regarding total mortality in two large recent observational studies on DM2  
5 patients from Denmark and Cleveland, US (38, 39). However, the Danish study also found  
6 reduced risk for CVD with metformin compared to SU (39), using a propensity score  
7 including age, sex, comorbidities, income and cardiac drugs as covariates, and used the score  
8 for matching limiting included patients. Possibly our study using propensity score for  
9 stratification of all included patients, and also including traditional cardiovascular risk factors  
10 as covariates, may better reflect the risk difference between metformin and SU, an  
11 important matter for clinical practice with many patients still given SU.  
12  
13  
14  
15  
16  
17  
18  
19  
20  
21

22 The increased risk for CVD and total mortality with insulin found in the present study could  
23 be due to these patients presenting a more severe disease. However, adjustment was made  
24 for diabetes duration and HbA1c among other covariates, and an increased risk caused by  
25 insulin per se cannot be ruled out, as also has been underlined in other recent observational  
26 studies (29-33, 36). Lifestyle measures with weight reduction may be of value for obese  
27 patients with insulin included as treatment. The on-going ORIGIN randomised trial  
28 comparing insulin glargine with omega-3 fatty acids or placebo for risk of CVD in patients  
29 with diabetes at high risk for vascular disease will give further information (37).  
30  
31  
32  
33  
34  
35  
36  
37  
38

39 Subgroup analyses with patients presenting different degrees of renal impairment were  
40 conducted, and did not show any increased risk of CVD, acidosis/serious infection or all-  
41 cause mortality associated with metformin-based treatments in patients with eGFR 30-45,  
42 45-60, or >60 mL/min/1.73 m<sup>2</sup>. Rather, metformin-based treatments were associated with  
43 reduced risks of all-cause mortality and acidosis/serious infection in patients with eGFR 45-  
44 60 or >60 mL/min/1.73 m<sup>2</sup>. The prevalence of renal impairment differed between the  
45 groups, with patients presenting an eGFR <45 mL/min/1.73 m<sup>2</sup> being rare in metformin-  
46 based treatments. However, the prevalence of eGFR 45-60 mL/min/1.73 m<sup>2</sup> ranged between  
47 10.7 % and 14.4 % in these patients, and did not differ much from other patients.  
48  
49  
50  
51  
52  
53  
54  
55  
56  
57  
58  
59  
60  
60 Consequently, the subgroup with eGFR 45-60 mL/min/1.73 m<sup>2</sup> was based on a surprisingly  
large material, while the subgroup with eGFR 30-45 mL/min/1.73 m<sup>2</sup> constituted relatively  
few patients.

1  
2  
3 A recently published observational study examined the effects of metformin in 19 691  
4 patients with diabetes and advanced cardiovascular disease, thus considered vulnerable to  
5 metformin (14). The results indicated significantly reduced risk of all-cause mortality in  
6 patients treated with metformin compared to other glucose-lowering treatments. Results  
7 were consistent in a subgroup of patients with renal impairment (eGFR 30-60 mL/min/1.73  
8 m<sup>2</sup>). The survey, however, only analysed all-cause mortality, and could therefore not detect  
9 potential cases of lactic acidosis. Furthermore, the follow up was short (2 years) and did not  
10 analyse patients with eGFR 30-45 and 45-60 mL/min/1.73 m<sup>2</sup>, separately. Further, glucose-  
11 lowering treatments were only specified as metformin use or not, and no adjustments for  
12 crucial covariates such as HbA1c or diabetes duration were made. Several studies have failed  
13 to demonstrate increased incidence rate of lactic acidosis in DM2 patients treated with  
14 metformin. Thus, DM2 with its comorbidities or any glucose-lowering treatment rather than  
15 metformin use *per se* have been suggested to be risk factors for lactic acidosis (12).  
16  
17  
18  
19  
20  
21  
22  
23  
24  
25  
26  
27  
28  
29

30 The large population, 51 675 DM2 patients, and extensive adjustments for many important  
31 covariates are apparent strengths of the present survey. Risk calculations were made,  
32 adjusted for covariates with propensity scores and in Cox regression models. The propensity  
33 score achieved perfectly well balanced groups regarding baseline characteristics indicating  
34 the robustness of this statistical analysis. The Cox regression models enabled more  
35 comprehensive comparisons between several glucose-lowering regimens. Data are collected  
36 from the NDR database with a currently estimated coverage of more than 90 % of all  
37 patients in hospital outpatient clinics and almost 80 % of all patients in primary care in  
38 Sweden, suggesting it to be highly representative of clinical practice. We also presented  
39 exposure time for the different glucose-lowering treatments, but unfortunately there was no  
40 useful information about doses. Furthermore, we presented exposure time for the different  
41 glucose-lowering treatments and median daily doses of metformin in each treatment group,  
42 which showed clinically relevant doses.  
43  
44  
45  
46  
47  
48  
49  
50  
51  
52  
53  
54

55 Despite extensive adjustments, covariates of possible importance could have been missed.  
56 Thus, the presence of allocation bias may not be fully avoided. Furthermore, patients who  
57 changed glucose-lowering treatment during the study were not censored. It could be that  
58 patients with advancing disease more frequently changed to a specific glucose-lowering  
59  
60



1  
2  
3 medication, diluting the results observed. Comparison of baseline characteristics indicated  
4 higher proportions of history of CVD, CHF and serious infections in patients changing  
5 treatment. This could have affected the results, even though the proportions of patients  
6 changing treatment were high in all groups. Only eight cases of diagnosed lactic acidosis  
7 were reported during the follow-up (4 cases in metformin only, 2 cases in metformin +  
8 insulin and 2 cases in insulin only), and thus analyses with lactic acidosis as an endpoint  
9 would not provide desirable strength. Therefore, a composite endpoint (acidosis/serious  
10 infections), including diagnosis of serious infections (n=4782), acute renal failure (n=914),  
11 acidosis (n=167) and shock (n=17), was used. The six most common diagnoses patients were  
12 hospitalised for in this composite endpoint were: pneumonia (unspecified), bacterial  
13 pneumonia (unspecified), acute renal failure (unspecified), acute tubulo-interstitial nephritis,  
14 sepsis (unspecified) and gastroenteritis and colitis of unspecified origin. Altogether this  
15 complicates the evaluation of lactic acidosis *per se*, although this diagnosis in practice only  
16 occurs in combination with severe infections or CVD. Furthermore, lactic acidosis reported  
17 with use of biguanides mostly involve phenformine, which was early withdrawn from the  
18 market, as lactic acidosis was 20 times more frequent than with metformin (12). In cases of  
19 lactic acidosis, plasma metformin concentration has also not proved to be of any prognostic  
20 significance (40). The patient group treated with other OHA, were mainly treated with SU  
21 and to a very limited degree with glitazones, acarbose or DPP-4 inhibitors during the study  
22 period. Investigation of the individual effectiveness of these agents would however be of  
23 interest in the future.

24  
25  
26  
27  
28  
29  
30  
31  
32  
33  
34  
35  
36  
37  
38  
39  
40  
41  
42  
43  
44  
45 In conclusion, this nation-wide observational study of 51 675 DM2 patients supports the  
46 previously observed effectiveness of metformin. Metformin was associated with reduced  
47 risk of all-cause mortality compared to both insulin and other OHA, and for several  
48 additional endpoints compared to insulin. The results were consistent in a subgroup of  
49 patients with renal impairment, and no increased risk of acidosis/serious infection was seen.  
50 Together with previous findings, this constitutes evident support to the less strict approach  
51 to metformin treatment in patients with renal impairment, advocated in most guidelines.  
52 Thus, considerably more DM2 patients may be considered for treatment with metformin.  
53  
54  
55  
56  
57  
58  
59  
60

### Data sharing

No additional data available.

### Copyright statement

I [Nils Ekström] the Corresponding Author of this article contained within the original manuscript which includes any diagrams & photographs, other illustrative material, video, film or any other material howsoever submitted by the Contributor(s) at any time and related to the Contribution (“the Contribution”) have the right to grant on behalf of all authors and do grant on behalf of all authors, a licence to the BMJ Publishing Group Ltd and its licensees, to permit this Contribution (if accepted) to be published in BMJ Open and any other BMJ Group products and to exploit all subsidiary rights, as set out in the licence at: ([http://group.bmj.com/products/journals/instructions-for-authors/BMJOpen\\_licence.pdf](http://group.bmj.com/products/journals/instructions-for-authors/BMJOpen_licence.pdf))

### Author contributions

NE, LS, BZ, JC, AMS, JMJ, KEO, SG and BE contributed to the conception and design. LS, JC and AMS contributed to the acquisition of data and performed the calculations. LS, NE, JC, BZ, SG, AMS and BE contributed to the analysis and interpretation of data. NE and BE contributed to drafting the article. NE, BE, BZ, JZ, AMS, LS, KEO, SG and JMJ contributed to revising the article critically for important intellectual content and final approval of the version to be submitted.

### Acknowledgements

We thank the patients, regional NDR coordinators and all participating nurses and physicians. The NDR is supported by the Swedish Society for Diabetology, and the Swedish Diabetes Association.

### Funding

The Region Västra Götaland and the Swedish Association of Local Authorities and Regions fund the NDR. LS, AMS, JMJ, and SG were also supported by an unrestricted research grant from BMS, France. The funders had no role in study design, data collection and analysis, decision to publish, or preparation of the manuscript.

1  
2  
3 Conflict of interest  
4

5 BE has served as a lecturer for all pharmacological companies manufacturing glucose-  
6 lowering agents and participated in advisory boards for Eli Lilly Sweden AB and Eli Lilly & Co,  
7 Sanofi-aventis, Sweden, Boehringer Ingelheim AB, Sweden, and MSD, Sweden.  
8  
9

10  
11  
12  
13 Disclaimer

14 Björn Zethelius (BZ) is employed by the Medical Products Agency (MPA), Uppsala Sweden.

15 BZ has not received any financial support or other benefits from BMS France or any  
16 commercial sponsor. Results and views of the present study represent the authors and not  
17 necessarily any official views of the MPA where BZ is employed.  
18  
19  
20  
21  
22  
23  
24  
25  
26  
27  
28  
29  
30  
31  
32  
33  
34  
35  
36  
37  
38  
39  
40  
41  
42  
43  
44  
45  
46  
47  
48  
49  
50  
51  
52  
53  
54  
55  
56  
57  
58  
59  
60

1  
2  
3 Figure legends  
4  
5  
6

7 Table 1: Baseline characteristics in all 51,675 type 2 diabetes patients and in groups based on  
8 glucose-lowering treatments. Means  $\pm$  one standard deviation (SD) and frequencies (%) are  
9 given. There were statistically significant differences ( $p < 0.001$ ) in all variables between the  
10 groups.  
11  
12  
13

14  
15  
16 ~~Table 3~~ Table 2: Adjusted hazard ratios (HR) with 95% confidence intervals (CI) for any CVD,  
17 fatal CVD, any acidosis/serious infection, fatal acidosis/serious infection, and all-cause  
18 mortality in all patients, in each treatment group, and with metformin only as reference.  
19 Adjustments were made for age, sex, diabetes duration, HbA1c, non-HDL-C, BMI, smoking,  
20 eGFR, multi-dose dispensation, previous hospitalization, history of CVD and CHF,  
21 microalbuminuria, and treatment with antihypertensive agents, lipid-lowering agents and  
22 cardiac glycosides.  
23  
24  
25  
26  
27  
28  
29

30  
31  
32 ~~Table 5~~ Table 3: Adjusted hazard ratios with 95 % confidence intervals for any CVD, fatal  
33 CVD, any acidosis/serious infection, fatal acidosis/serious infection, and all-cause mortality in  
34 patients with insulin only and patients with metformin only as reference, or in patients with  
35 other OHA only and patients with metformin only as reference. Each comparison was  
36 adjusted by stratification with octiles of propensity scores.  
37  
38  
39  
40  
41

42  
43 ~~Table 6~~ Table 4: Adjusted hazard ratios (HR) with 95% confidence intervals for any CVD, any  
44 acidosis/serious infection, and all-cause mortality in subgroups of patients with different  
45 eGFR intervals. HR associated with the examined agent in any combination is given with any  
46 other glucose-lowering treatment as reference. Adjustments were made for age, sex,  
47 diabetes duration, HbA1c, non-HDL-C, BMI, smoking, eGFR, multi-dose dispensation,  
48 previous hospitalization, history of CVD and CHF, microalbuminuria, and treatment with  
49 antihypertensive agents, lipid-lowering agents and cardiac glycosides.  
50  
51  
52  
53  
54  
55  
56

57  
58 Figure 1: Time (months) to event of all-cause mortality (a), any CVD (b), and any  
59 acidosis/serious infection (c) in each treatment group, unadjusted.  
60

1  
2  
3 Appendix Table 1: Baseline characteristics in groups of patients treated with metformin only,  
4 insulin only, or other OHA only, applied in Cox regression analyses presented in Table 2.  
5 Means  $\pm$  standard deviation (SD) and proportions (%) of clinical variables at baseline. P  
6 values are given for comparison between metformin only and insulin only, and between  
7 metformin only and other OHA only, unadjusted and after adjustment by stratification for  
8 octiles of propensity scores applied for each comparison.  
9  
10  
11  
12  
13  
14

15  
16 **Table 2** Appendix Table 2: Time of exposure (months) to specific glucose-lowering agents,  
17 and proportions changing treatment (%) in each group.  
18  
19  
20

21  
22 **Table 4** Appendix Table 3: Numbers and frequencies (%) of endpoint events in each  
23 treatment group.  
24  
25  
26

27  
28 Appendix Table 4: Adjusted hazard ratios (HR) with 95% confidence intervals (CI) for any  
29 CVD, fatal CVD, any acidosis/serious infection, fatal acidosis/serious infection, and all-cause  
30 mortality in all patients, in each treatment group, and with other OHA only as reference.  
31  
32  
33

34  
35 Appendix Table 5: Adjusted hazard ratios with 95 % confidence intervals for any CVD, fatal  
36 CVD, any acidosis/serious infection, fatal acidosis/serious infection, and all-cause mortality in  
37 patients with SU only and patients with metformin only as reference.  
38  
39  
40

41  
42 Appendix Table 6: Appendix Table 6. Adjusted hazard ratios (HR) with 95% confidence  
43 intervals (CI) and p-values for any CVD, fatal CVD, any acidosis/serious infection, fatal  
44 acidosis/serious infection, and all-cause mortality in patients treated with insulin + other  
45 OHA or insulin + metformin, and with insulin only as reference.  
46  
47  
48  
49

50  
51  
52 Appendix Figure 1: Enrollment of patients.  
53  
54  
55  
56  
57  
58  
59  
60

## References

1. Zimmet P, Alberti KG, Shaw J. Global and societal implications of the diabetes epidemic. *Nature*. 2001;414:782-7.
2. Effect of intensive blood-glucose control with metformin on complications in overweight patients with type 2 diabetes (UKPDS 34). UK Prospective Diabetes Study (UKPDS) Group. *Lancet*. 1998;352:854-65.
3. Holman RR, Paul SK, Bethel MA, et al. 10-year follow-up of intensive glucose control in type 2 diabetes. *N Engl J Med*. 2008;359:1577-89.
4. Kooy A, de Jager J, Lehert P, et al. Long-term effects of metformin on metabolism and microvascular and macrovascular disease in patients with type 2 diabetes mellitus. *Arch Intern Med*. 2009;169:616-25.
5. Kahn SE, Haffner SM, Heise MA, et al. Glycemic durability of rosiglitazone, metformin, or glyburide monotherapy. *N Engl J Med*. 2006;355:2427-43.
6. Nathan DM, Buse JB, Davidson MB, et al. Medical management of hyperglycemia in type 2 diabetes: a consensus algorithm for the initiation and adjustment of therapy: a consensus statement of the American Diabetes Association and the European Association for the Study of Diabetes. *Diabetes Care*. 2009;32:193-203.
7. Handelsman Y, Mechanick JI, Blonde L, et al. American Association of Clinical Endocrinologists Medical Guidelines for Clinical Practice for developing a diabetes mellitus comprehensive care plan. *Endocr Pract*. 2011;17 Suppl 2:1-53.
8. Type 2 Diabetes: National Clinical Guideline for Management in Primary and Secondary Care (Update). London: Royal College of Physicians of London.; 2008.
9. National guidelines for diabetes care. 2010 [cited 2011 June, 17]; Available from: <http://www.socialstyrelsen.se/nationalguidelines/nationalguidelinesfordiabetescare>.
10. Bailey CJ, Turner RC. Metformin. *N Engl J Med*. 1996;334:574-9.
11. Isomaa B, Almgren P, Tuomi T, et al. Cardiovascular morbidity and mortality associated with the metabolic syndrome. *Diabetes Care*. 2001;24:683-9.
12. Salpeter SR, Greyber E, Pasternak GA, et al. Risk of fatal and nonfatal lactic acidosis with metformin use in type 2 diabetes mellitus. *Cochrane Database Syst Rev*. 2010:CD002967.
13. Eurich DT, McAlister FA, Blackburn DF, et al. Benefits and harms of antidiabetic agents in patients with diabetes and heart failure: systematic review. *BMJ*. 2007;335:497.
14. Roussel R, Travert F, Pasquet B, et al. Metformin use and mortality among patients with diabetes and atherothrombosis. *Arch Intern Med*. 2010;170:1892-9.
15. Wettermark B, Hammar N, Fored CM, et al. The new Swedish Prescribed Drug Register--opportunities for pharmacoepidemiological research and experience from the first six months. *Pharmacoepidemiol Drug Saf*. 2007;16:726-35.
16. Merlo J, Lindblad U, Pessah-Rasmussen H, et al. Comparison of different procedures to identify probable cases of myocardial infarction and stroke in two Swedish prospective cohort studies using local and national routine registers. *Eur J Epidemiol*. 2000;16:235-43.
17. Tunstall-Pedoe H, Kuulasmaa K, Amouyel P, et al. Myocardial infarction and coronary deaths in the World Health Organization MONICA Project. Registration procedures, event rates, and case-fatality rates in 38 populations from 21 countries in four continents. *Circulation*. 1994;90:583-612.

18. Eeg-Olofsson K, Cederholm J, Nilsson PM, et al. Risk of cardiovascular disease and mortality in overweight and obese patients with type 2 diabetes: an observational study in 13,087 patients. *Diabetologia*. 2009;52:65-73.
19. Eeg-Olofsson K, Cederholm J, Nilsson PM, et al. Glycemic control and cardiovascular disease in 7,454 patients with type 1 diabetes: an observational study from the Swedish National Diabetes Register (NDR). *Diabetes Care*. 2010;33:1640-6.
20. Eliasson B, Svensson AM, Miftaraj M, et al. Clinical use and effectiveness of lipid lowering therapies in diabetes mellitus-an observational study from the Swedish national diabetes register. *PLoS One*. 2011;6:e18744.
21. Lind M, Bounias I, Olsson M, et al. Glycaemic control and incidence of heart failure in 20 985 patients with type 1 diabetes: an observational study. *Lancet*. 2011.
22. Hoelzel W, Weykamp C, Jeppsson JO, et al. IFCC reference system for measurement of hemoglobin A1c in human blood and the national standardization schemes in the United States, Japan, and Sweden: a method-comparison study. *Clin Chem*. 2004;50:166-74.
23. Levey AS, Bosch JP, Lewis JB, et al. A more accurate method to estimate glomerular filtration rate from serum creatinine: a new prediction equation. Modification of Diet in Renal Disease Study Group. *Ann Intern Med*. 1999;130:461-70.
24. Lee BK, Lessler J, Stuart EA. Improving propensity score weighting using machine learning. *Statistics in Medicine*. 2010;29:337-46.
25. LIN DY, WEI LJ, YING Z. Checking the Cox model with cumulative sums of martingale-based residuals. *Biometrika*. 1993;80:557-72.
26. Collett D. *Modelling survival data in medical research*. 2 ed. Boca Raton: CRC press; 2003.
27. GRAMBSCH PM, THERNEAU TM. Proportional hazards tests and diagnostics based on weighted residuals. *Biometrika*. 1994;81:515-26.
- ~~28. Colayco DC, Niu F, McCombs JS, et al. A1C and cardiovascular outcomes in type 2 diabetes: a nested case-control study. *Diabetes Care*. 2011;34:77-83.~~
29. Margolis DJ, Hoffstad O, Strom BL. Association between serious ischemic cardiac outcomes and medications used to treat diabetes. *Pharmacoepidemiol Drug Saf*. 2008;17:753-9.
30. Currie CJ, Peters JR, Tynan A, et al. Survival as a function of HbA(1c) in people with type 2 diabetes: a retrospective cohort study. *Lancet*. 2010;375:481-9.
31. Gamble JM, Simpson SH, Eurich DT, et al. Insulin use and increased risk of mortality in type 2 diabetes: a cohort study. *Diabetes Obes Metab*. 2010;12:47-53.
32. Mellbin LG, Malmberg K, Norhammar A, et al. The impact of glucose lowering treatment on long-term prognosis in patients with type 2 diabetes and myocardial infarction: a report from the DIGAMI 2 trial. *Eur Heart J*. 2008;29:166-76.
33. Mellbin LG, Malmberg K, Norhammar A, et al. Prognostic implications of glucose-lowering treatment in patients with acute myocardial infarction and diabetes: experiences from an extended follow-up of the Diabetes Mellitus Insulin-Glucose Infusion in Acute Myocardial Infarction (DIGAMI) 2 Study. *Diabetologia*. 2011;54:1308-17.
- ~~34. Malmberg K, Ryden L, Wedel H, et al. Intense metabolic control by means of insulin in patients with diabetes mellitus and acute myocardial infarction (DIGAMI 2): effects on mortality and morbidity. *Eur Heart J*. 2005;26:650-61.~~
- ~~35. Malmberg K, Ryden L, Efendic S, et al. Randomized trial of insulin-glucose infusion followed by subcutaneous insulin treatment in diabetic patients with acute~~

1  
2  
3 myocardial infarction (DIGAMI study): effects on mortality at 1 year. *J Am Coll Cardiol*.  
4 1995;26:57-65.  
5

6 36. Eeg-Olofsson K, Cederholm J, Nilsson PM, et al. New aspects of HbA1c as a risk  
7 factor for cardiovascular diseases in type 2 diabetes: an observational study from the  
8 Swedish National Diabetes Register (NDR). *J Intern Med*. 2010;268:471-82.

9 37. Gerstein H, Yusuf S, Riddle MC, et al. Rationale, design, and baseline  
10 characteristics for a large international trial of cardiovascular disease prevention in people  
11 with dysglycemia: the ORIGIN Trial (Outcome Reduction with an Initial Glargine  
12 Intervention). *Am Heart J*. 2008;155:26-32, e1-6.

13 38. Pantalone KM, Kattan MW, Yu C, et al. Increase in Overall Mortality Risk in  
14 Patients with Type 2 Diabetes Receiving Glipizide, Glyburide, or Glimepiride Monotherapy  
15 vs. Metformin: A Retrospective Analysis. *Diabetes Obes Metab*. 2012.

16 39. Schramm TK, Gislason GH, Vaag A, et al. Mortality and cardiovascular risk  
17 associated with different insulin secretagogues compared with metformin in type 2 diabetes,  
18 with or without a previous myocardial infarction: a nationwide study. *Eur Heart J*.  
19 2011;32:1900-8.

20 40. Lalau JD, Race JM. Lactic acidosis in metformin-treated patients. Prognostic  
21 value of arterial lactate levels and plasma metformin concentrations. *Drug Saf*. 1999;20:377-  
22 84.  
23  
24  
25  
26  
27  
28  
29  
30  
31  
32  
33  
34  
35  
36  
37  
38  
39  
40  
41  
42  
43  
44  
45  
46  
47  
48  
49  
50  
51  
52  
53  
54  
55  
56  
57  
58  
59  
60



Table 1. Baseline characteristics in all 51,675 type 2 diabetes patients and in groups based on glucose-lowering treatments.

|                                    | Metformin Only | Metformin + other OHA | Metformin + insulin | Insulin only  | Other OHA only | Insulin + other OHA | Metformin + insulin + other OHA | Total          |
|------------------------------------|----------------|-----------------------|---------------------|---------------|----------------|---------------------|---------------------------------|----------------|
| N                                  | 14 697 (28 %)  | 8 807 (17 %)          | 7 109 (14 %)        | 12 291 (24 %) | 5 171 (10%)    | 1 365 (2.6 %)       | 2 235 (4.3 %)                   | 51 675 (100 %) |
| Age (Years)                        | 63.8 (9.7)     | 65.4 (9.7)            | 64.6 (8.8)          | 65.2 (10.5)   | 69.7 (9.5)     | 69.6 (9.1)          | 64.7 (8.5)                      | 65.3 (9.8)     |
| HbA1c (%)                          | 6.9 (3.1)      | 7.3 (3.2)             | 7.7 (3.4)           | 7.6 (3.4)     | 6.9 (3.0)      | 7.7 (3.3)           | 7.9 (3.4)                       | 7.3 (3.3)      |
| < 6.9                              | 8131 (55.3%)   | 3296 (37.4%)          | 1710 (24.1%)        | 3433 (27.9%)  | 2898 (56.0%)   | 326 (23.9%)         | 361 (16.2%)                     | 20155 (39.0%)  |
| 6.9 - 8.8                          | 6037 (41.1%)   | 4982 (56.6%)          | 4240 (59.6%)        | 7045 (57.3%)  | 2139 (41.4%)   | 845 (61.9%)         | 1478 (66.1%)                    | 26766 (51.8%)  |
| > 8.8                              | 529 (3.6%)     | 529 (6.0%)            | 1159 (16.3%)        | 1813 (14.8%)  | 134 (2.6%)     | 194 (14.2%)         | 396 (17.7%)                     | 4754 (9.2%)    |
| Systolic blood pressure (mmHg)     | 139.4 (16.6)   | 141.2 (16.9)          | 140.8 (16.8)        | 138.9 (18.0)  | 141.4 (17.5)   | 141.9 (18.2)        | 141.9 (16.4)                    | 140.1 (17.2)   |
| Diabetes duration (Years)          | 4.6 (4.3)      | 8.9 (5.9)             | 11.6 (7.0)          | 14.3 (10.4)   | 7.5 (6.2)      | 11.6 (6.8)          | 12.0 (6.2)                      | 9.4 (8.0)      |
| eGFR (mL/min/1.73 m <sup>2</sup> ) | 82.0 (20.2)    | 80.4 (21.1)           | 79.2 (21.5)         | 73.6 (23.8)   | 73.8 (21.1)    | 68.9 (22.4)         | 79.5 (21.2)                     | 78.1 (21.9)    |
| <45                                | 231 (1.6%)     | 222 (2.5%)            | 238 (3.3%)          | 1370 (11.1%)  | 404 (7.8%)     | 214 (15.7%)         | 63 (2.8%)                       | 2742 (5.3%)    |
| 45-60                              | 1572 (10.7%)   | 1167 (13.3%)          | 1024 (14.4%)        | 1955 (15.9%)  | 888 (17.2%)    | 255 (18.7%)         | 316 (14.1%)                     | 7177 (13.9%)   |
| >60                                | 12894 (87.7%)  | 7418 (84.2%)          | 5847 (82.2%)        | 8966 (72.9%)  | 3879 (75.0%)   | 896 (65.6%)         | 1856 (83.0%)                    | 41756 (80.8%)  |
| BMI (Kg/m <sup>2</sup> )           | 30.7 (4.9)     | 29.9 (4.9)            | 31.6 (5.0)          | 27.4 (4.8)    | 27.2 (4.5)     | 28.3 (4.9)          | 31.1 (5.1)                      | 29.5 (5.1)     |
| Non-HDL-C (mmol/L)                 | 3.64 (1.00)    | 3.53 (0.98)           | 3.39 (0.97)         | 3.35 (0.98)   | 3.60 (0.99)    | 3.52 (1.04)         | 3.39 (0.94)                     | 3.50 (0.99)    |
| Microalbuminuria                   | 21.0%          | 25.9%                 | 33.8%               | 30.8%         | 24.2%          | 34.4%               | 34.5%                           | 27.2%          |
| Previous hospitalisation           | 11.5%          | 11.6%                 | 18.1%               | 23.1%         | 15.5%          | 22.9%               | 15.2%                           | 16.1%          |
| Female sex                         | 44.7%          | 40.0%                 | 43.5%               | 40.2%         | 39.2%          | 39.8%               | 41.4%                           | 41.9%          |
| History of CVD                     | 15.9%          | 17.6%                 | 25.9%               | 26.4%         | 21.4%          | 30.2%               | 24.6%                           | 21.4%          |
| History of CHF                     | 3.5%           | 3.9%                  | 7.3%                | 8.9%          | 6.4%           | 10.1%               | 5.5%                            | 5.9%           |
| History of serious infections      | 1.8%           | 1.6%                  | 2.9%                | 4.9%          | 2.8%           | 5.2%                | 2.7%                            | 2.9%           |
| Cardiac glycosides                 | 2.6%           | 2.7%                  | 4.1%                | 3.0%          | 4.3%           | 6.2%                | 4.3%                            | 3.3%           |
| Organic nitrates                   | 6.3%           | 7.4%                  | 9.7%                | 8.5%          | 8.8%           | 13.0%               | 10.1%                           | 8.1%           |
| ASA                                | 45.4%          | 48.8%                 | 57.3%               | 45.7%         | 45.9%          | 55.4%               | 58.6%                           | 48.6%          |
| Lipid modifying agents             | 49.9%          | 54.0%                 | 61.7%               | 44.8%         | 44.1%          | 51.7%               | 63.6%                           | 51.1%          |
| Antihypertensive agents            | 71.8%          | 74.0%                 | 81.9%               | 66.2%         | 71.3%          | 79.5%               | 83.0%                           | 72.9%          |
| Multi-dose dispensation            | 1.4%           | 1.6%                  | 2.7%                | 3.0%          | 1.5%           | 3.7%                | 2.6%                            | 2.1%           |
| Smoker                             | 14.8%          | 14.0%                 | 12.8%               | 14.9%         | 12.3%          | 12.2%               | 13.6%                           | 14.0%          |

Means  $\pm$  one standard deviation (SD) and frequencies (%) are given. There were statistically significant differences ( $p < 0.001$ ) in all variables between the groups.

Table 2. Adjusted hazard ratios (HR) with 95% confidence intervals (CI) for any CVD, fatal CVD, any acidosis/serious infection, fatal acidosis/serious infection, and all-cause mortality in all patients, in each treatment group, and with metformin only as reference

|                                  | Metformin only | Insulin only        | Other OHA only      | Insulin + other OHA | Metformin + other OHA | Metformin + insulin           | Metformin + Insulin + other OHA |
|----------------------------------|----------------|---------------------|---------------------|---------------------|-----------------------|-------------------------------|---------------------------------|
| Any CVD                          | Reference      | 1.28 (1.19-1.37)*** | 1.13 (1.04-1.23)**  | 1.40 (1.24-1.58)*** | 1.11 (1.03-1.20)**    | 1.28 (1.19-1.38)***           | 1.33 (1.19-1.49)***             |
| Fatal CVD                        | Reference      | 1.41 (1.18-1.68)*** | 1.30 (1.08-1.56)**  | 1.17 (0.91-1.51)    | *                     | *                             | 1.21 (0.92-1.58)                |
| Any acidosis/serious infection   | Reference      | 1.37 (1.26-1.50)*** | 1.16 (1.04-1.28)**  | 1.31 (1.13-1.51)*** | 1.04 (0.95-1.14)      | 1.20 (1.09-1.32)***           | 1.15 (1.00-1.32)*               |
| Fatal acidosis/serious infection | Reference      | 1.63 (1.29-2.07)*** | 1.28 (0.98-1.67)    | 1.32 (0.91-1.89)    | 0.94 (0.72-1.23)      | 1.41 (1.08-1.83) <sup>†</sup> | 1.12 (0.73-1.67)                |
| All-cause mortality              | Reference      | 1.47 (1.35-1.61)*** | 1.30 (1.18-1.44)*** | 1.30 (1.12-1.50)*** | 1.15 (1.05-1.27)**    | 1.25 (1.13-1.38)***           | 1.31 (1.14-1.52)***             |

<sup>†</sup> P<0.05

\*\* P<0.01

\*\*\* P<0.001

\*Non-proportional hazards, group excluded from analysis.

Adjustments were made for age, sex, diabetes duration, HbA1c, non-HDL-C, BMI, smoking, eGFR, multi-dose dispensation, previous hospitalization, history of CVD and CHF, microalbuminuria, and treatment with antihypertensive agents, lipid lowering agents and cardiac glycosides.

1  
2  
3  
4  
5  
6  
7  
8  
9  
10  
11  
12  
13  
14  
15  
16  
17  
18  
19  
20  
21  
22  
23  
24  
25  
26  
27  
28  
29  
30  
31  
32  
33  
34  
35  
36  
37  
38  
39  
40  
41  
42  
43  
44  
45  
46  
47  
48  
49

Table 3. Adjusted hazard ratios with 95 % confidence intervals for any CVD, fatal CVD, any acidosis/serious infection, fatal acidosis/serious infection, and all-cause mortality in patients with insulin only and patients with metformin only as reference, or in patients with other OHA only and patients with metformin only as reference

|                                  | Events/Patients<br>N/N | Events/Patients<br>N/N | Hazard ratio<br>(95% CI)                | P-value |
|----------------------------------|------------------------|------------------------|-----------------------------------------|---------|
|                                  | <b>Insulin only</b>    | <b>Metformin only</b>  | <b>Insulin only Vs metformin only</b>   |         |
| Any CVD                          | 2389 / 11427           | 1734 / 14317           | 1.18 (1.07-1.29)                        | <0.001  |
| Fatal CVD                        | 681 / 12285            | 264 / 14696            | 1.12 (0.91-1.40)                        | 0.29    |
| Any acidosis/serious infection   | 1867 / 11860           | 1154 / 14517           | 1.28 (1.14-1.43)                        | <0.001  |
| Fatal acidosis/serious infection | 325 / 12284            | 127 / 14697            | 1.45 (1.07-1.97)                        | 0.019   |
| All-cause mortality              | 2002 / 12291           | 971 / 14697            | 1.34 (1.19-1.50)                        | <0.001  |
|                                  | <b>Other OHA only</b>  | <b>Metformin only</b>  | <b>Other OHA only Vs metformin only</b> |         |
| Any CVD                          | 929 / 4964             | 1734 / 14317           | 1.02 (0.93-1.12)                        | 0.71    |
| Fatal CVD                        | 237 / 5171             | 264 / 14696            | 1.03 (0.84-1.26)                        | 0.80    |
| Any acidosis/serious infection   | 623 / 5062             | 1154 / 14517           | 1.05 (0.94-1.18)                        | 0.41    |
| Fatal acidosis/serious infection | 109 / 5171             | 127 / 14697            | 1.13 (0.83-1.53)                        | 0.44    |
| All-cause mortality              | 745 / 5171             | 971 / 14697            | 1.13 (1.01-1.27)                        | 0.032   |

Each comparison was adjusted by stratification with octiles of propensity scores.

Table 4. Adjusted hazard ratios (HR) with 95% confidence intervals for any CVD, any acidosis/serious infection, and all-cause mortality in subgroups of patients with different eGFR intervals. HR associated with the examined agent in any combination is given with any other glucose-lowering treatment as reference.

|                                       | 30 ≤ eGFR < 45    |                        |                   | 45 ≤ eGFR < 60    |                        |                    | eGFR ≥ 60         |                        |                     | All patients |        |
|---------------------------------------|-------------------|------------------------|-------------------|-------------------|------------------------|--------------------|-------------------|------------------------|---------------------|--------------|--------|
|                                       | N<br>(% of total) | Events<br>(% of total) | HR<br>(95 % CI)   | N<br>(% of total) | Events<br>(% of total) | HR<br>(95 % CI)    | N<br>(% of total) | Events<br>(% of total) | HR<br>(95 % CI)     | N            | Events |
| <b>Any CVD</b>                        |                   |                        |                   |                   |                        |                    |                   |                        |                     |              |        |
| <b>Metformin</b>                      | 670 (35.4%)       | 210 (30.7%)            | 1.00 (0.83-1.19)  | 3839 (57.7%)      | 849 (51.2%)            | 0.94 (0.84-1.05)   | 27083 (67.3%)     | 3698 (63.4%)           | 0.98 (0.92-1.05)    | 31628        | 4774   |
| <b>Insulin</b>                        | 1180 (62.3%)      | 474 (69.2%)            | 1.30 (1.02-1.64)* | 3201 (48.1%)      | 930 (56.1%)            | 1.24 (1.09-1.42)** | 16718 (41.5%)     | 2853 (48.9%)           | 1.19 (1.11-1.27)*** | 21503        | 4476   |
| <b>Other OHA</b>                      | 702 (37.1%)       | 241 (35.2%)            | 1.03 (0.85-1.26)  | 2450 (36.8%)      | 608 (36.7%)            | 1.05 (0.93-1.18)   | 13552 (33.7%)     | 2065 (35.4%)           | 1.03 (0.97-1.09)    | 16817        | 2965   |
| <b>Total in group</b>                 | 1894              | 685                    |                   | 6655              | 1657                   |                    | 40239             | 5829                   |                     |              |        |
| <b>Any acidosis/serious infection</b> |                   |                        |                   |                   |                        |                    |                   |                        |                     |              |        |
| <b>Metformin</b>                      | 692 (33.9%)       | 143 (28.4%)            | 0.98 (0.79-1.21)  | 4000 (57.5%)      | 557 (49.4%)            | 0.85 (0.74-0.97)*  | 27618 (67.3%)     | 2444 (60.6%)           | 0.91 (0.84-0.98)*   | 32345        | 3155   |
| <b>Insulin</b>                        | 1302 (63.7%)      | 366 (72.6%)            | 1.34 (1.02-1.76)* | 3406 (48.9%)      | 652 (57.9%)            | 1.07 (0.91-1.26)   | 17152 (41.8%)     | 2057 (51%)             | 1.22 (1.12-1.32)*** | 22310        | 3260   |
| <b>Other OHA</b>                      | 738 (36.1%)       | 166 (32.9%)            | *                 | 2555 (36.7%)      | 379 (33.6%)            | 0.87 (0.75-1.00)   | 13852 (33.7%)     | 1375 (34.1%)           | 1.02 (0.95-1.09)    | 17265        | 1960   |
| <b>Total in group</b>                 | 2044              | 504                    |                   | 6960              | 1127                   |                    | 41048             | 4034                   |                     |              |        |
| <b>All-cause mortality</b>            |                   |                        |                   |                   |                        |                    |                   |                        |                     |              |        |
| <b>Metformin</b>                      | 715 (33.3%)       | 179 (27%)              | 1.02 (0.84-1.24)  | 4079 (56.8%)      | 558 (46.5%)            | 0.87 (0.77-0.99)*  | 28015 (67.1%)     | 2120 (56.9%)           | 0.87 (0.81-0.94)*** | 32848        | 2873   |
| <b>Insulin</b>                        | 1386 (64.6%)      | 468 (70.5%)            | 1.16 (0.91-1.47)  | 3550 (49.5%)      | 701 (58.4%)            | 1.12 (0.95-1.31)   | 17565 (42.1%)     | 1921 (51.5%)           | 1.29 (1.19-1.41)*** | 23000        | 3328   |
| <b>Other OHA</b>                      | 766 (35.7%)       | 222 (33.4%)            | 0.97 (0.79-1.19)  | 2626 (36.6%)      | 429 (35.7%)            | 0.97 (0.84-1.11)   | 14049 (33.6%)     | 1375 (36.9%)           | 1.10 (1.02-1.19)*   | 17578        | 2087   |
| <b>Total in group</b>                 | 2146              | 664                    |                   | 7177              | 1201                   |                    | 41756             | 3729                   |                     |              |        |

\* P<0.05

\*\* P<0.01

\*\*\* P<0.001

\* Non-proportional hazards, group excluded from analysis.

Adjustments were made for age, sex, diabetes duration, HbA1c, non-HDL-C, BMI, smoking, eGFR, multi-dose dispensation, previous hospitalization, history of CVD and CHF, microalbuminuria, and treatment with antihypertensive agents, lipid lowering agents and cardiac glycosides.

Figure 1. Time (months) to event of all-cause mortality (a), any CVD (b), and any infection/acidosis (c) in each treatment group, unadjusted

a. All-cause mortality



b. Any CVD



c. Any acidosis/infection



1  
2  
3  
4  
5  
6  
7  
8  
9  
10  
11  
12  
13  
14  
15  
16  
17  
18  
19  
20  
21  
22  
23  
24  
25  
26  
27  
28  
29  
30  
31  
32  
33  
34  
35  
36  
37  
38  
39  
40  
41  
42  
43  
44  
45  
46  
47

Appendix Table 1. Baseline characteristics in groups of patients treated with metformin only, insulin only, or other OHA only, applied in Cox regression analyses presented in Table 2.

|                                    | Metformin Only | Insulin only | Other OHA only | P metformin only/<br>insulin only<br>Unadjusted | P metformin only/<br>insulin only<br>Adjusted for PS | P metformin only/<br>other OHA only<br>Unadjusted | P metformin only/<br>other OHA only<br>Adjusted for PS |
|------------------------------------|----------------|--------------|----------------|-------------------------------------------------|------------------------------------------------------|---------------------------------------------------|--------------------------------------------------------|
| N                                  | 14697          | 12291        | 5171           |                                                 |                                                      |                                                   |                                                        |
| Age (Years)                        | 63.8 (9.7)     | 65.2 (10.5)  | 69.7 (9.5)     | <0.001                                          | 0.49                                                 | <0.001                                            | 0.126                                                  |
| HbA1c (%)                          | 51.9 (10.4)    | 60.0 (13.6)  | 51.4 (9.5)     | <0.001                                          | 0.46                                                 | 0.002                                             | 0.24                                                   |
| Systolic blood pressure (mmHg)     | 139.4 (16.6)   | 138.9 (18.0) | 141.4 (17.5)   | 0.018                                           | 0.96                                                 | <0.001                                            | 0.164                                                  |
| Diabetes duration (Years)          | 4.6 (4.3)      | 14.3 (10.4)  | 7.5 (6.2)      | <0.001                                          | 0.78                                                 | <0.001                                            | 0.37                                                   |
| eGFR (mL/min/1.73 m <sup>2</sup> ) | 82.0 (20.2)    | 73.6 (23.8)  | 73.8 (21.1)    | <0.001                                          | 0.94                                                 | <0.001                                            | 0.177                                                  |
| BMI (Kg/m <sup>2</sup> )           | 30.7 (4.9)     | 27.4 (4.8)   | 27.2 (4.5)     | <0.001                                          | 0.53                                                 | <0.001                                            | 0.008                                                  |
| Non-HDL-C (mmol/L)                 | 3.64 (1.00)    | 3.35 (0.98)  | 3.60 (0.99)    | <0.001                                          | 0.78                                                 | 0.008                                             | 0.62                                                   |
| Microalbuminuria                   | 21.0%          | 30.8%        | 24.2%          | <0.001                                          | 0.46                                                 | <0.001                                            | 0.50                                                   |
| Previous hospitalisation           | 11.5%          | 23.1%        | 15.5%          | <0.001                                          | 0.57                                                 | <0.001                                            | 0.73                                                   |
| Female sex                         | 44.7%          | 40.2%        | 39.2%          | <0.001                                          | 0.73                                                 | <0.001                                            | 0.59                                                   |
| History of CVD                     | 15.9%          | 26.4%        | 21.4%          | <0.001                                          | 0.97                                                 | <0.001                                            | 0.111                                                  |
| History of CHF                     | 3.5%           | 8.9%         | 6.4%           | <0.001                                          | 0.022                                                | <0.001                                            | 0.74                                                   |
| History of serious infections      | 1.8%           | 4.9%         | 2.8%           | <0.001                                          | 0.96                                                 | <0.001                                            | 0.72                                                   |
| Cardiac glycosides                 | 2.6%           | 3.0%         | 4.3%           | 0.064                                           | 0.96                                                 | <0.001                                            | 0.196                                                  |
| Organic nitrates                   | 6.3%           | 8.5%         | 8.8%           | <0.001                                          | 0.61                                                 | <0.001                                            | 0.45                                                   |
| ASA                                | 45.4%          | 45.7%        | 45.9%          | 0.56                                            | 0.58                                                 | 0.52                                              | 0.65                                                   |
| Lipid modifying agents             | 49.9%          | 44.8%        | 44.1%          | <0.001                                          | 0.88                                                 | <0.001                                            | 0.94                                                   |
| Antihypertensive agents            | 71.8%          | 66.2%        | 71.3%          | <0.001                                          | 0.38                                                 | 0.58                                              | 0.81                                                   |
| Multi-dose dispensation            | 1.4%           | 3.0%         | 1.5%           | <0.001                                          | 0.97                                                 | 0.54                                              | 0.97                                                   |
| Smoker                             | 14.8%          | 14.9%        | 12.3%          | 0.77                                            | 0.104                                                | <0.001                                            | 0.28                                                   |

Means  $\pm$  standard deviation (SD) and proportions (%) of clinical variables at baseline. P values are given for comparison between metformin only and insulin only, and between metformin only and other OHA only, unadjusted and after adjustment by stratification for octiles of propensity scores applied for each comparison.

1  
2  
3  
4  
5  
6  
7  
8  
9  
10  
11  
12  
13  
14  
15  
16  
17  
18  
19  
20  
21  
22  
23  
24  
25  
26  
27  
28  
29  
30  
31  
32  
33  
34  
35  
36  
37  
38  
39  
40  
41  
42  
43  
44  
45  
46  
47  
48  
49

Appendix Table 2: Time of exposure (months) to specific glucose-lowering agents, and proportions changing treatment (%) in each group.

|                                  | <b>Metformin Only</b> | <b>Metformin + other OHA</b> | <b>Metformin + insulin</b> | <b>Insulin only</b> | <b>Other OHA only</b> | <b>Insulin + other OHA</b> | <b>Metformin + insulin + other OHA</b> |
|----------------------------------|-----------------------|------------------------------|----------------------------|---------------------|-----------------------|----------------------------|----------------------------------------|
| Mean Exposure time to metformin  | 49,4                  | 51,0                         | 46,3                       |                     |                       |                            | 48,9                                   |
| Mean Exposure time to insulin    |                       |                              | 51,8                       | 55,3                |                       | 54,1                       | 53,4                                   |
| Mean Exposure time to Other Oral |                       | 49,1                         |                            |                     | 45,3                  | 39,5                       | 48,3                                   |
| Change treatment (%)             | 80.8 %                | 80.5 %                       | 81.8 %                     | 91.3 %              | 88.4 %                | 56.5 %                     | 93.9 %                                 |

For peer review only

Appendix Table 3: Numbers and frequencies (%) of endpoint events in each treatment group.

|                                  | Metformin Only | Metformin + other OHA | Metformin + insulin | Insulin only | Other OHA only | Insulin + other OHA | Metformin+ insulin + other OHA |
|----------------------------------|----------------|-----------------------|---------------------|--------------|----------------|---------------------|--------------------------------|
| Any CVD                          | 1734 (3.3%)    | 1287 (4%)             | 1338 (5.4%)         | 2389 (5.9%)  | 929 (5.2%)     | 334 (7.8%)          | 415 (5.4%)                     |
| Fatal CVD                        | 264 (0.5%)     | 230 (0.6%)            | 276 (1%)            | 681 (1.4%)   | 237 (1.2%)     | 94 (1.8%)           | 74 (0.8%)                      |
| Acidosis/serious infection       | 1154 (2.1%)    | 843 (2.5%)            | 899 (3.4%)          | 1867 (4.3%)  | 623 (3.3%)     | 235 (5%)            | 259 (3.1%)                     |
| Fatal acidosis/serious infection | 127 (0.2%)     | 95 (0.3%)             | 124 (0.4%)          | 325 (0.7%)   | 109 (0.5%)     | 41 (0.8%)           | 29 (0.3%)                      |
| All-cause mortality              | 971 (1.7%)     | 834 (2.4%)            | 818 (2.9%)          | 2002 (4.2%)  | 745 (3.7%)     | 258 (4.9%)          | 250 (2.8%)                     |



Appendix Table 4. Adjusted hazard ratios (HR) with 95% confidence intervals (CI) for any CVD, fatal CVD, any acidosis/serious infection, fatal acidosis/serious infection, and all-cause mortality in all patients, in each treatment group, and with other OHA only as reference

|                                  | Other OHA only | Insulin Only     | Metformin only   | Insulin + other OHA | Metformin + other OHA | Metformin + insulin | Metformin + insulin + other OHA |
|----------------------------------|----------------|------------------|------------------|---------------------|-----------------------|---------------------|---------------------------------|
| Any CVD                          | Reference      | 1.13 (1.04-1.22) | 0.88 (0.81-0.96) | 1.24 (1.09-1.41)    | 0.98 (0.9-1.07)       | 1.12 (1.03-1.23)    | 1.17 (1.04-1.32)                |
| Fatal CVD                        | Reference      | 1.09 (0.92-1.28) | 0.77 (0.64-0.93) | 0.91 (0.7-1.16)     | *                     | *                   | 0.93 (0.71-1.22)                |
| Any acidosis/serious infection   | Reference      | 1.19 (1.08-1.31) | 0.87 (0.78-0.96) | 1.14 (0.97-1.32)    | 0.9 (0.81-1)          | 1.04 (0.93-1.16)    | 1 (0.86-1.16)                   |
| Fatal acidosis/serious infection | Reference      | 1.27 (1.01-1.62) | 0.78 (0.6-1.02)  | 1.03 (0.71-1.48)    | 0.73 (0.55-0.97)      | 1.1 (0.83-1.45)     | 0.88 (0.57-1.32)                |
| All-cause mortality              | Reference      | 1.12 (1.02-1.23) | 0.76 (0.69-0.84) | 0.99 (0.85-1.14)    | 0.88 (0.8-0.98)       | 0.96 (0.86-1.07)    | 1.01 (0.86-1.17)                |

\*Non-proportional hazards, group excluded from analysis.

Adjustments were made for age, sex, diabetes duration, HbA1c, non-HDL-C, BMI, smoking, eGFR, multi-dose dispensation, previous hospitalization, history of CVD and CHF, microalbuminuria, and treatment with antihypertensive agents, lipid lowering agents and cardiac glycosides.

Appendix Table 5. Adjusted hazard ratios with 95 % confidence intervals for any CVD, fatal CVD, any acidosis/serious infection, fatal acidosis/serious infection, and all-cause mortality in patients with SU only and patients with metformin only as reference

|                                  | <b>SU only</b>         | <b>Metformin Only</b>  | <b>SU only Vs Metformin only</b> |         |
|----------------------------------|------------------------|------------------------|----------------------------------|---------|
|                                  | Events/Patients<br>N/N | Events/Patients<br>N/N | Hazard ratio<br>(95% CI)         | P-value |
| Any CVD                          | 788 / 4084             | 1734 / 14317           | 0.99 (0.89-1.09)                 | 0.82    |
| Fatal CVD                        | 210 / 4272             | 264 / 14696            | 1.01 (0.82-1.25)                 | 0.91    |
| Any acidosis/serious infection   | 506 / 4178             | 1154 / 14517           | 1.0 (0.89-1.14)                  | 0.96    |
| Fatal acidosis/serious infection | 94 / 4272              | 127 / 14697            | 1.17 (0.85-1.60)                 | 0.34    |
| All-cause mortality              | 664 / 4272             | 971 / 14697            | 1.15 (1.02-1.30)                 | 0.019   |

Adjusted by stratification with octiles of propensity scores.

1  
2  
3  
4  
5  
6  
7  
8  
9  
10  
11  
12  
13  
14  
15  
16  
17  
18  
19  
20  
21  
22  
23  
24  
25  
26  
27  
28  
29  
30  
31  
32  
33  
34  
35  
36  
37  
38  
39  
40  
41  
42  
43  
44  
45  
46  
47  
48  
49

Appendix Table 6. Adjusted hazard ratios (HR) with 95% confidence intervals (CI) and p-values for any CVD, fatal CVD, any acidosis/serious infection, fatal acidosis/serious infection, and all-cause mortality in patients treated with insulin + other OHA or insulin + metformin, and with insulin only as reference

|                                  | Insulin only | Insulin + other OHA |         | Insulin + metformin |         |
|----------------------------------|--------------|---------------------|---------|---------------------|---------|
|                                  |              | HR (95% CI)         | P-value | HR (95% CI)         | P-value |
| Any CVD                          | Reference    | 1.10 (0.98-1.23)    | 0.1154  | 0.96 (0.89-1.03)    | 0.2823  |
| Fatal CVD                        | Reference    | 0.84 (0.67-1.05)    | 0.1334  | 0.90 (0.77-1.05)    | 0.1687  |
| Any acidosis/serious infection   | Reference    | 0.96 (0.84-1.1)     | 0.5976  | 0.86 (0.79-0.94)    | 0.0007  |
| Fatal acidosis/serious infection | Reference    | 0.82 (0.58-1.13)    | 0.2413  | 0.85 (0.68-1.06)    | 0.1532  |
| All-cause mortality              | Reference    | 0.89 (0.78-1.01)    | 0.0766  | 0.84 (0.76-0.91)    | <.0001  |

Adjustments were made for age, sex, diabetes duration, HbA1c, non-HDL-C, BMI, smoking, eGFR, multi-dose dispensation, previous hospitalization, history of CVD and CHF, microalbuminuria, and treatment with antihypertensive agents, lipid lowering agents and cardiac glycosides.

Appendix Figure 1. Enrollment of patients

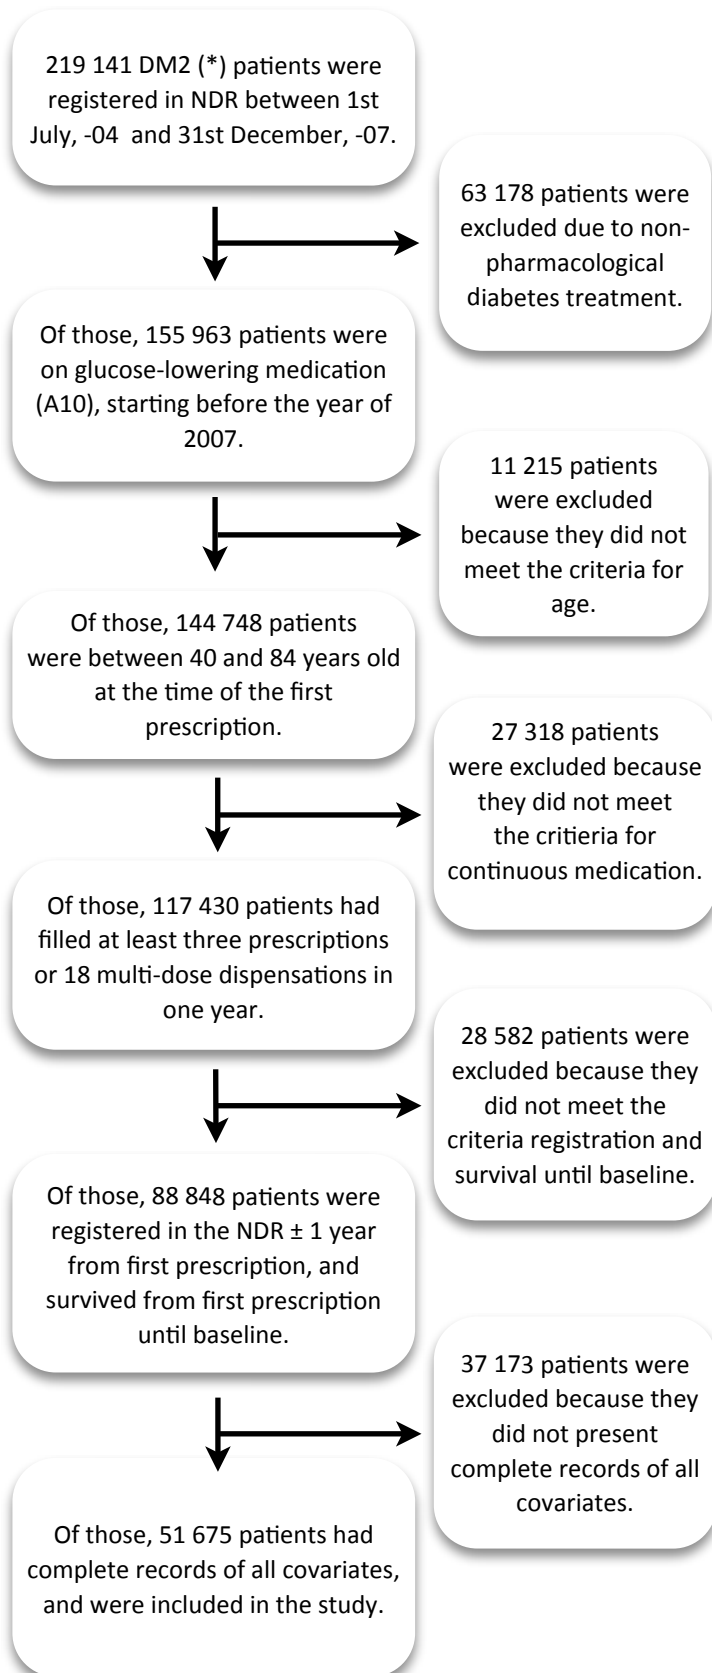

\* DM2 is Type 2 Diabetes Mellitus

## Definitions of the endpoints (Appendix Text)

### Cardiovascular disease (CVD)

CVD was defined as diagnosis of myocardial infarction (ICD-10 code I21), angina pectoris (ICD-10 code I20.0), intracerebral haemorrhage, cerebral infarction, unspecified stroke (ICD-10 codes I61, I63, I64 and I679), peripheral vascular disease (PVD, ICD-10 codes E105, E115, E145, I702, I731, I739 and I792), or intervention with percutaneous coronary intervention (PCI) or coronary artery bypass grafting (CABG), whichever occurred first.

### Acidosis/serious infection

Acidosis/infection was defined as diagnosis of acidosis or chock (ICD-10 codes E10.1, E10.1A, E10.1D, E10.1X, E11.1, E11.1A, E11.1D, E11.1X, E13.1, E14.1, E87.2, R57.1, R57.2, R57.8 or R57.9, or diagnosis of serious infection (ICD-10 codes A00-A09, A15-A19, A32.7, A39-A41, A42.7, A48, B37.7, I00-I02, I33, I38, I39, J13-J18, J85, J86, K25, K61, K80.0, K80.3, K80.4, K81, K83.0, K85, K86, M00, M46.2, M72.6, M86.0, M86.1, M86.8 or M86.9 or acute renal failure (ICD-10 codes N10.9 or N17).
