# Supplementary figures and images for: Effectiveness and safety of metformin in 51 675 patients with type 2 diabetes and different levels of renal function: a cohort study from the Swedish National Diabetes Register
Source: PubMed Central journal article supplement — BMJ Open. 2012 Jul 13;2(4):e001076. doi: 10.1136/bmjopen-2012-001076 (PMC3400073; doi:10.1136/bmjopen-2012-001076), 2012-07-13

## Appendix Figure 1. Enrollment of patients

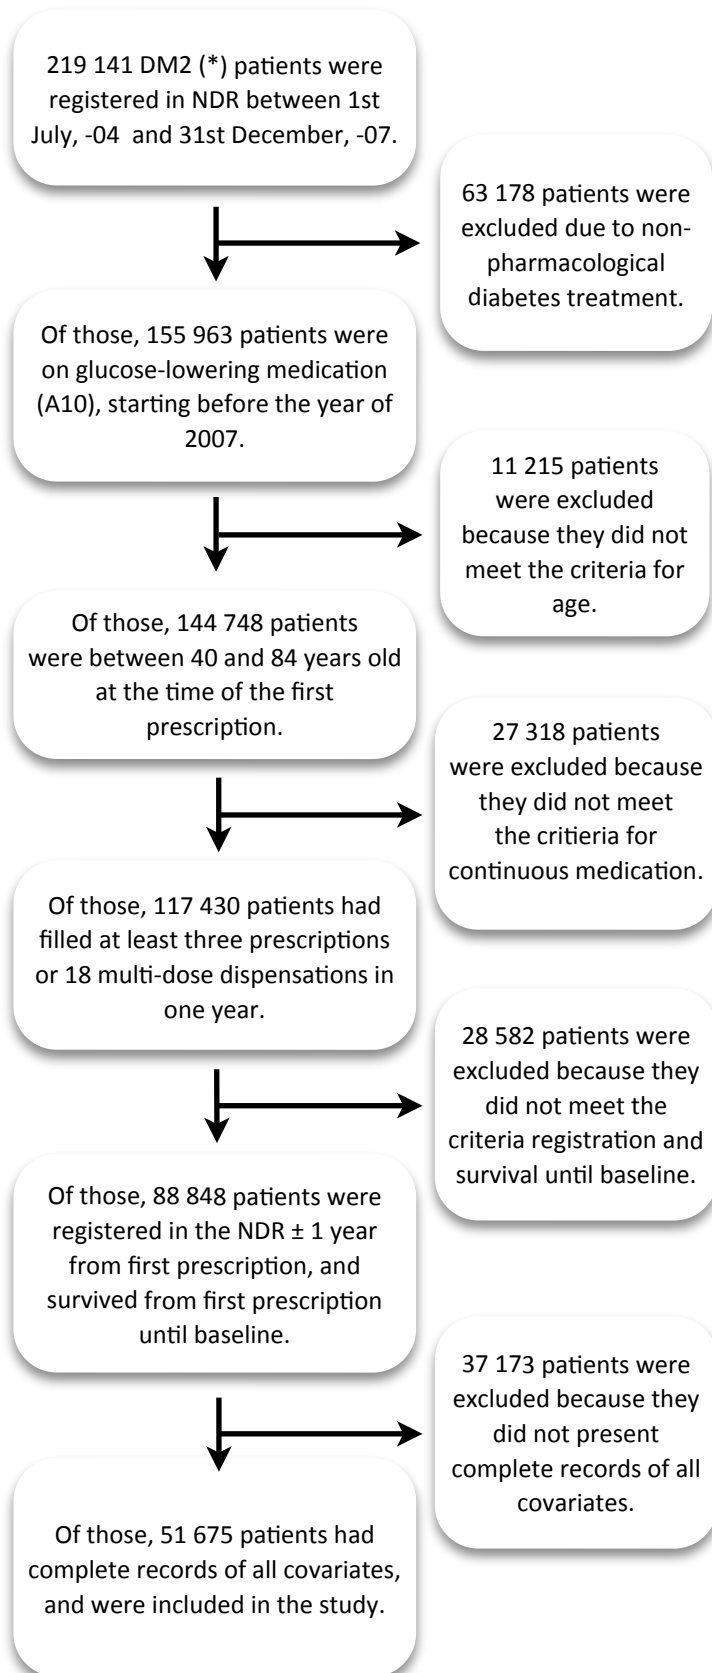

\* DM2 is Type 2 Diabetes Mellitus

Supplement: bmjopen-2012-001076-s1.pdf [file bmjopen-2012-001076-s1.pdf]
